# Supplementary material for: I2/TBHP mediated domino synthesis of 2-(2,4-dioxo-1,4-dihydroquinazolin-3(2H)-yl)-N-aryl/alkyl benzamides and evaluation of their anticancer and docking studies
Source: PubMed Central journal article supplement — RSC Adv. 2022 Jun 6;12(26):16589–98. doi: 10.1039/d2ra02216h (PMC9169238; doi:10.1039/d2ra02216h), 2022-06-06

# **I<sub>2</sub>/TBHP mediated domino synthesis of 2-(2,4-dioxo-1,4-dihydroquinazolin-3(2H)-yl)-N-aryl/alkyl benzamides and evaluation of their anticancer and docking studies**

Anil Kumar Soda,<sup>a,b</sup> Phani Krishna C. S,<sup>a,b</sup> Sai Krishna Chilaka,<sup>a,b</sup> Vamshi Krishna E,<sup>b,c</sup> Sunil Misra<sup>b,c</sup> and Sridhar Madabhushi\*<sup>a,b</sup>

<sup>a</sup>*Fluoro-Agrochemicals Department, CSIR-Indian Institute of Chemical Technology, Hyderabad-500007, India*

<sup>b</sup>*Academy of Scientific and Innovative Research (AcSIR), Ghaziabad- 201002, India*

<sup>c</sup>*Applied Biology Division, CSIR-Indian Institute of Chemical Technology, Hyderabad-500007, India*

E-mail: [sridharm@iict.res.in](mailto:sridharm@iict.res.in)

## Supporting Information

Table of contents:

<sup>1</sup>H and <sup>13</sup>C NMR Spectra for compounds (**3a-u**, **6a**, **6b**, **4a** & **5a**) ..... 2-26

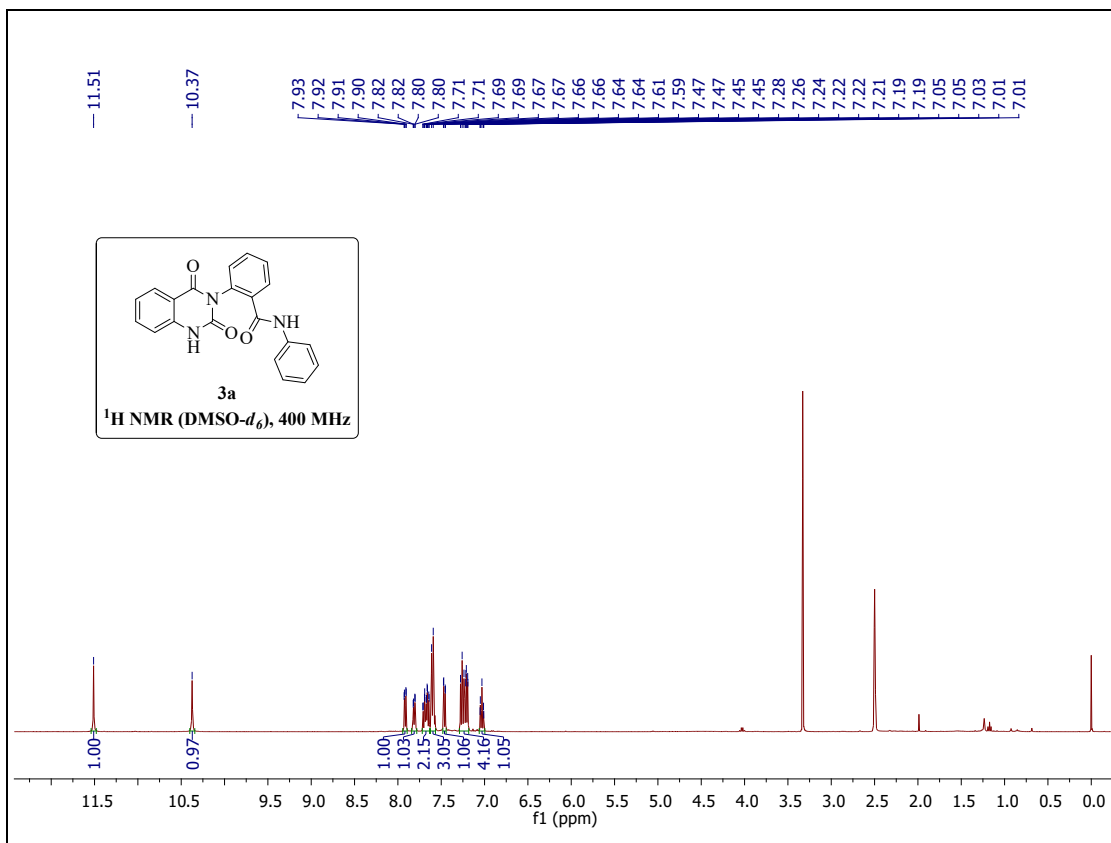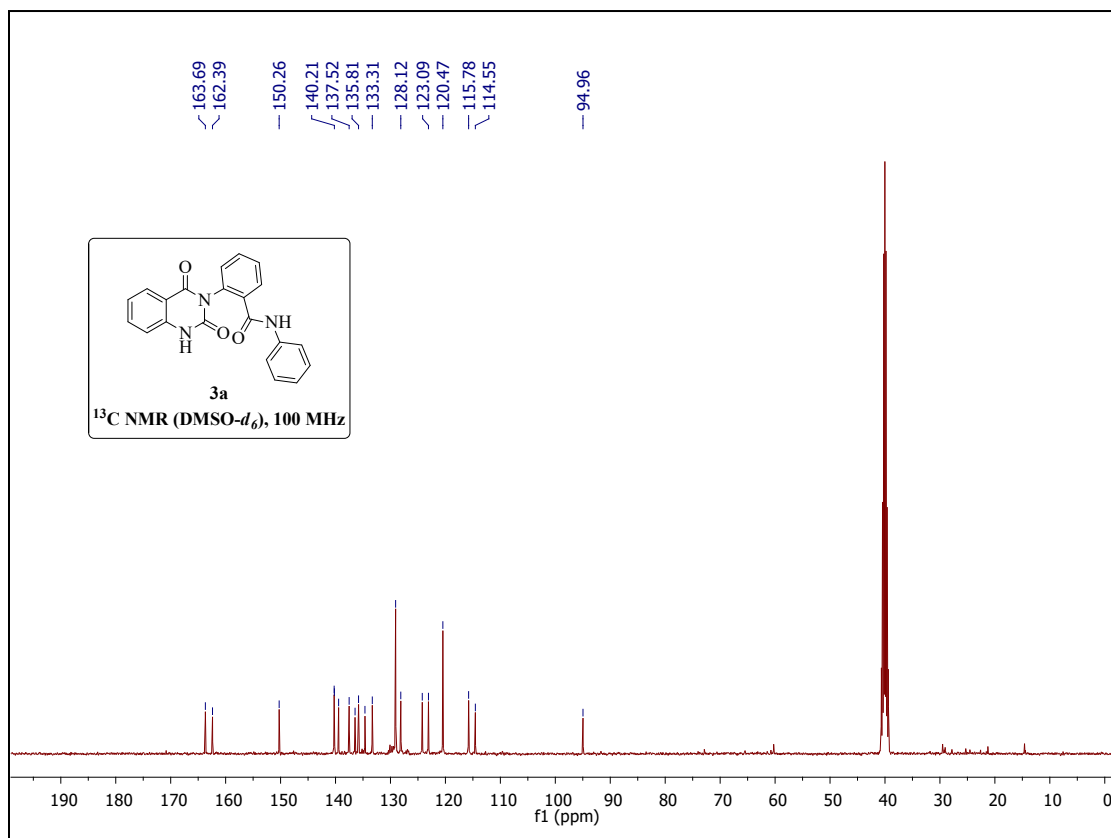

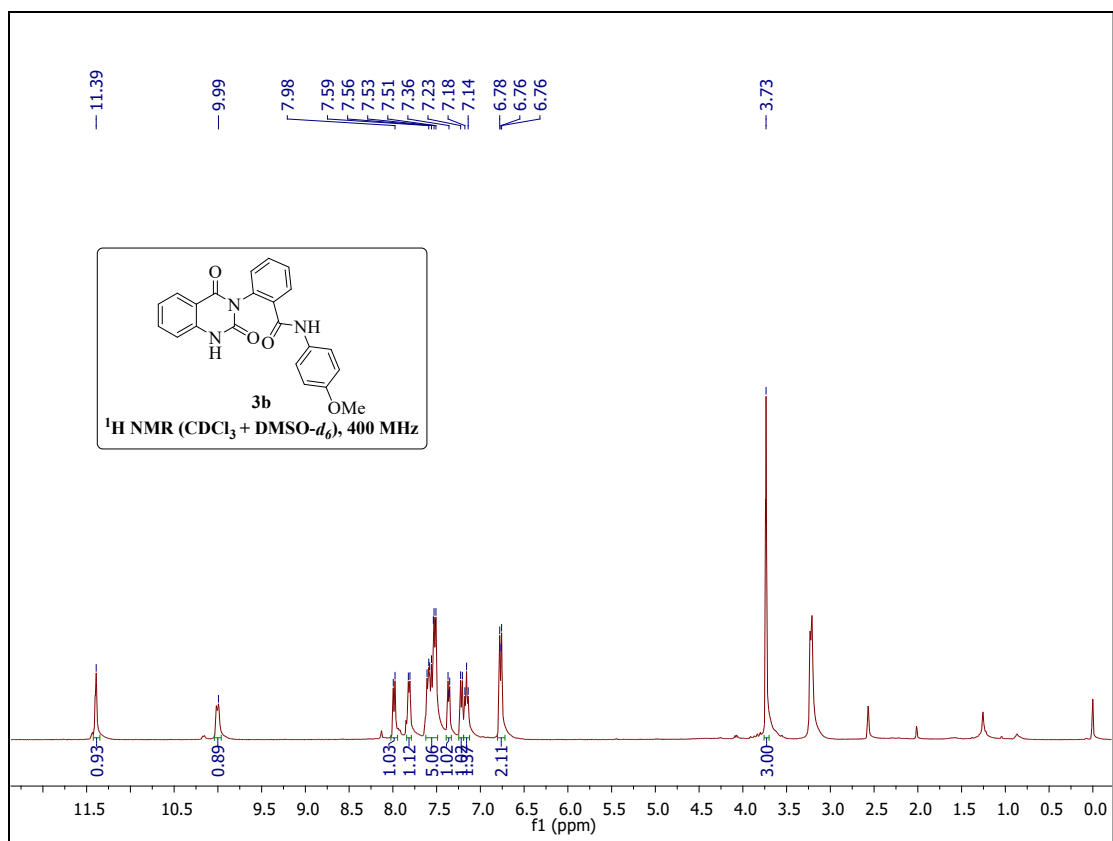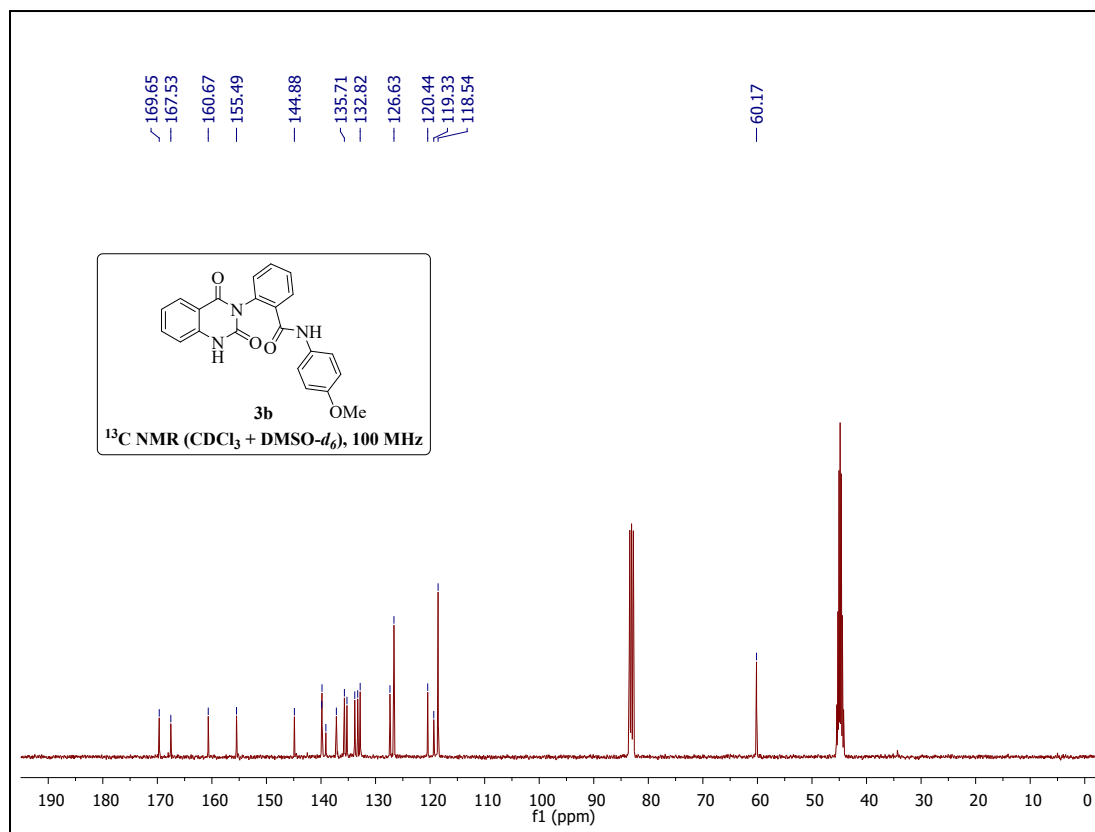

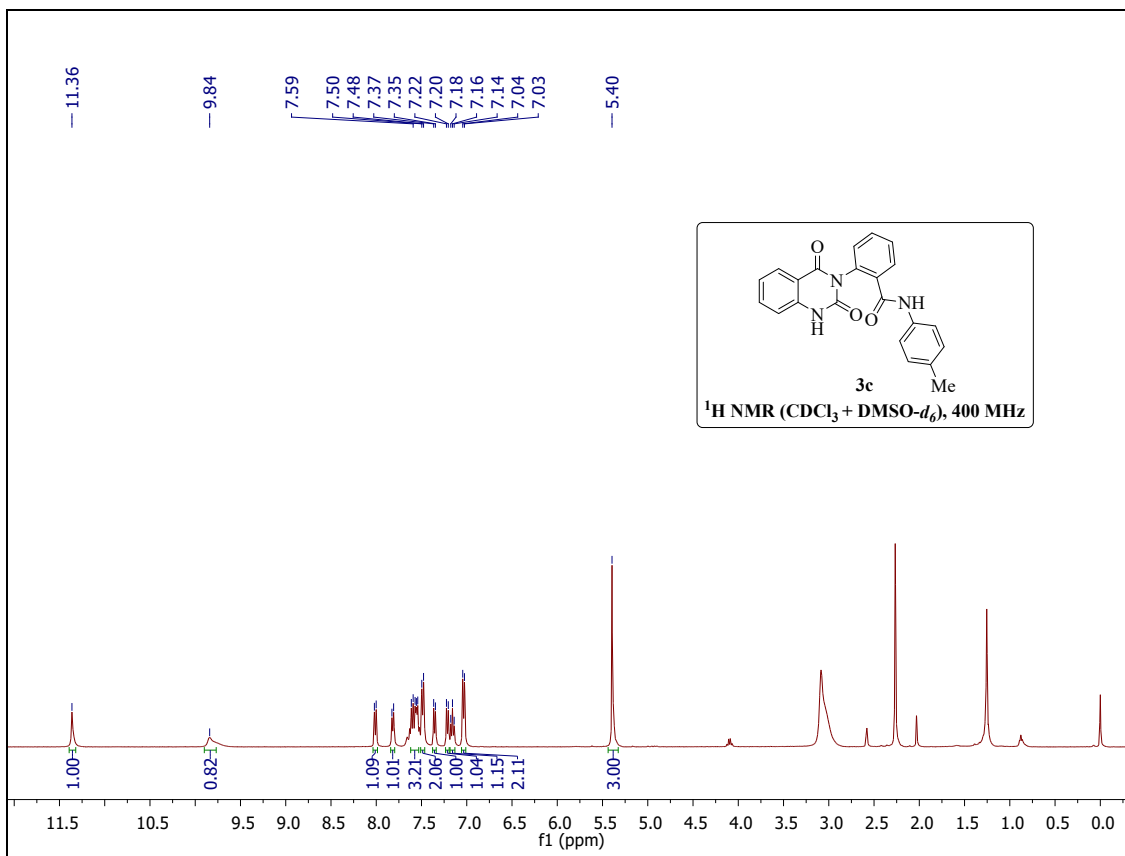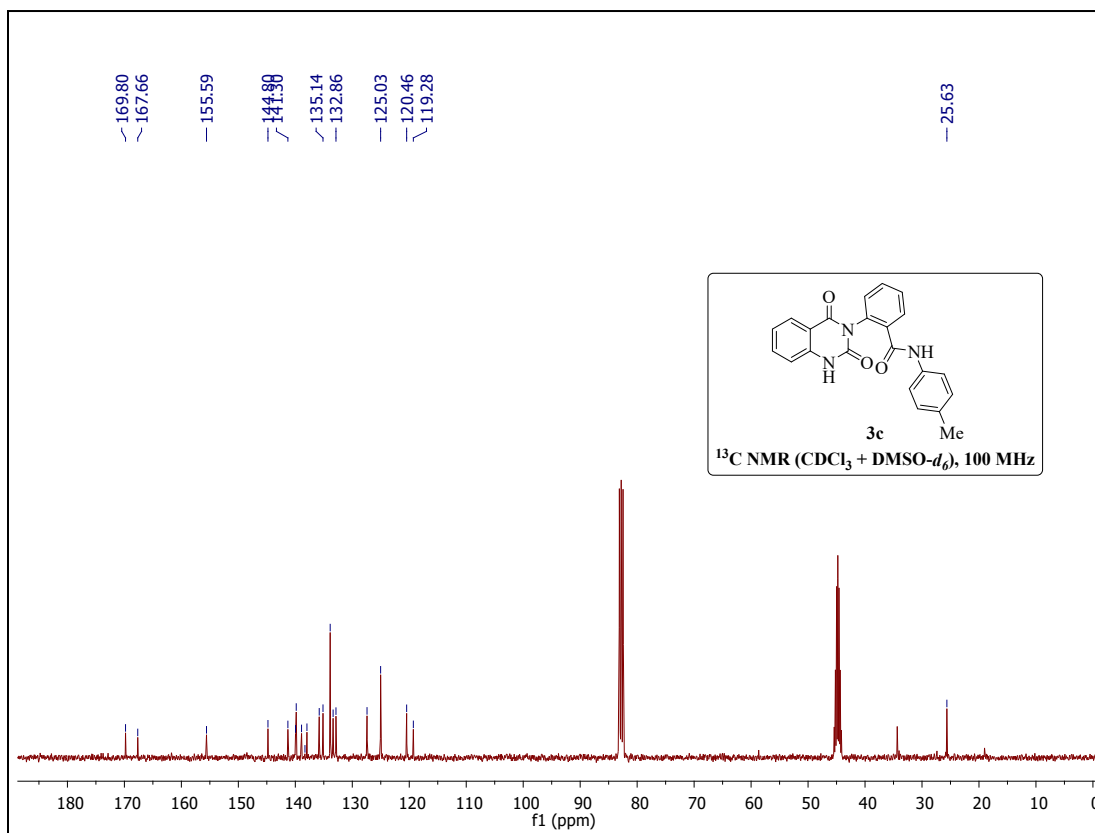

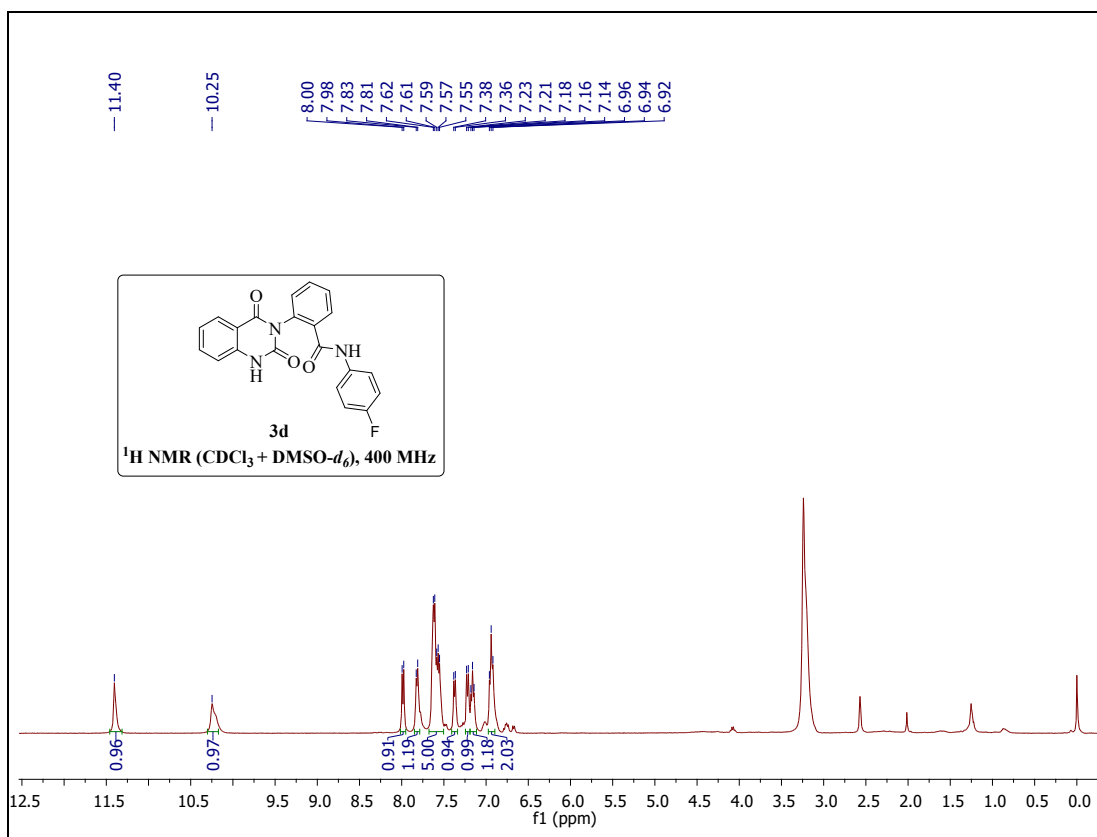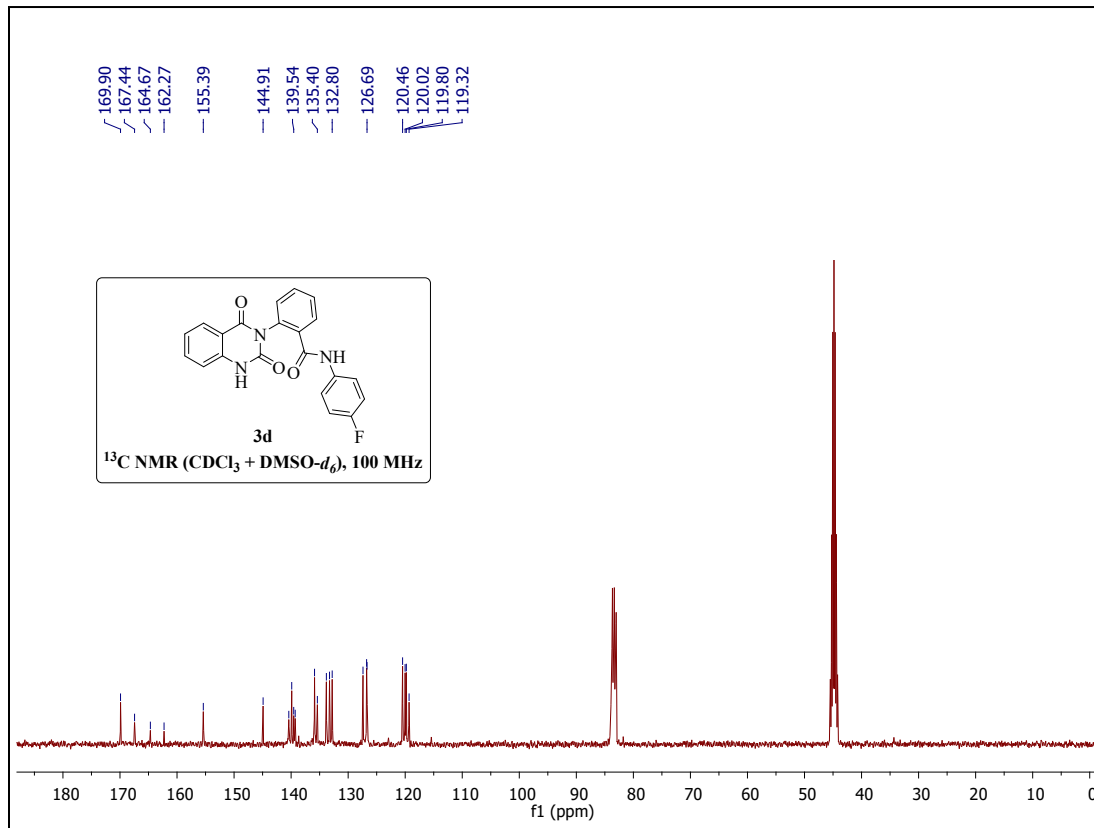

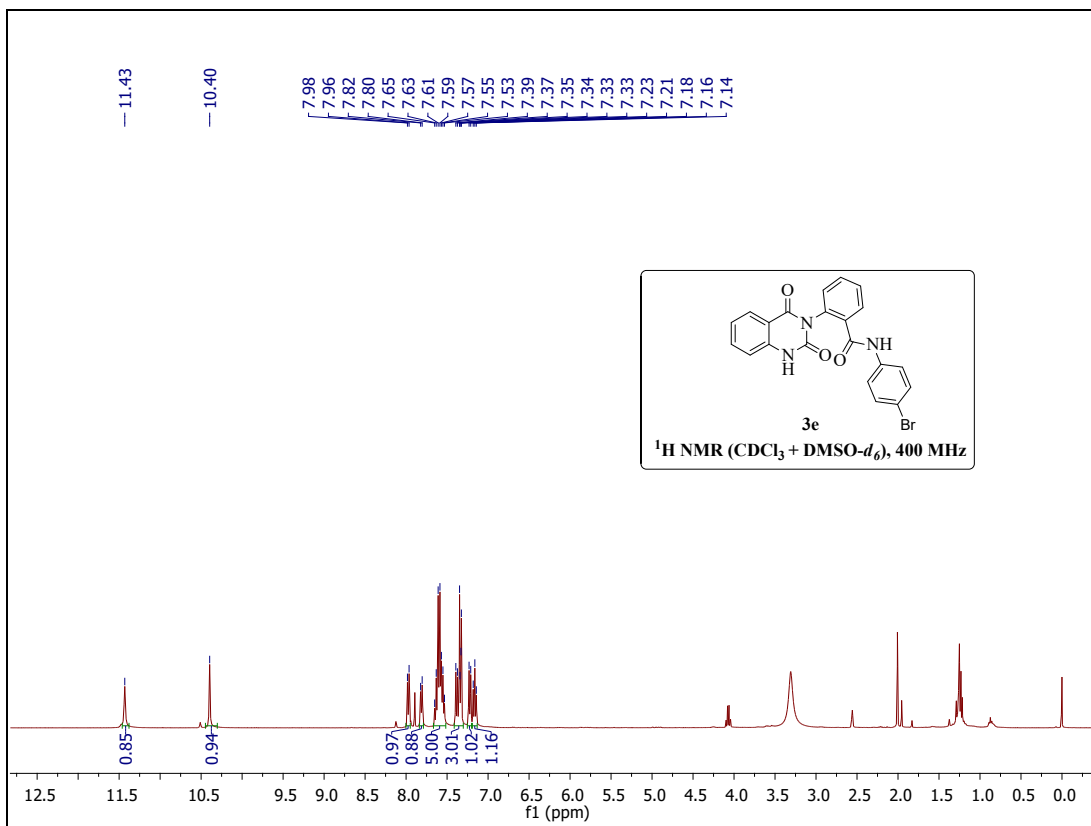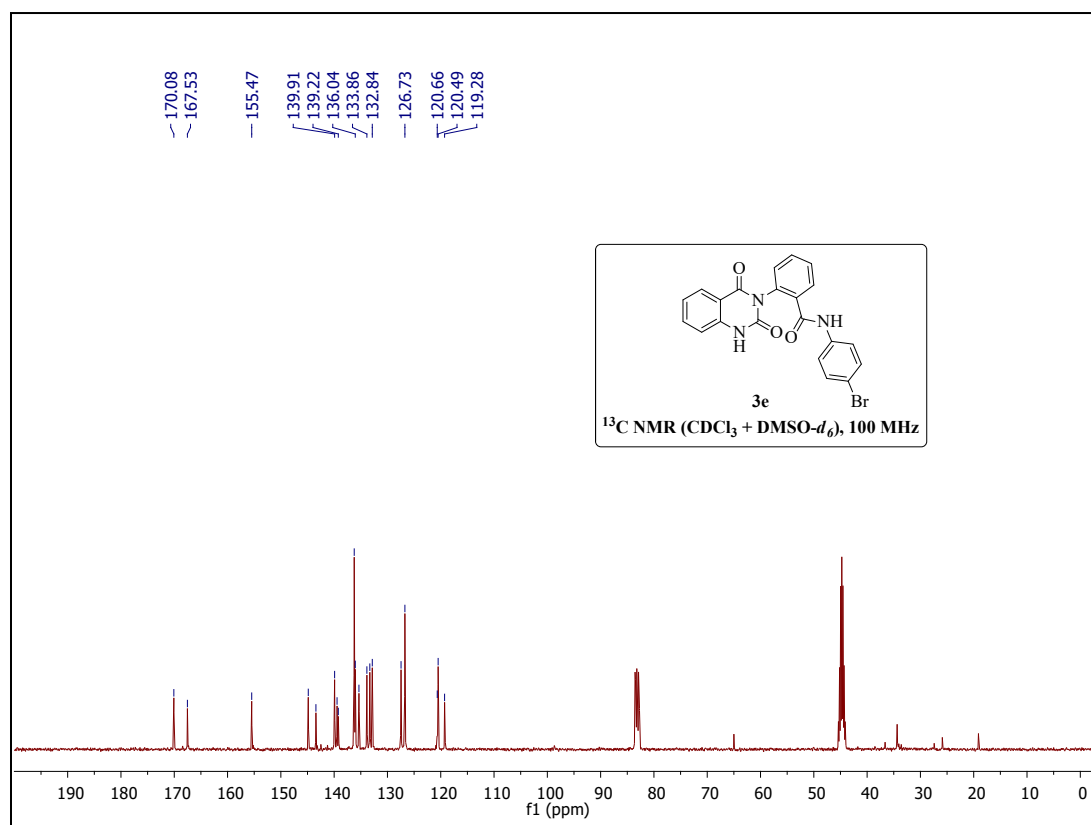

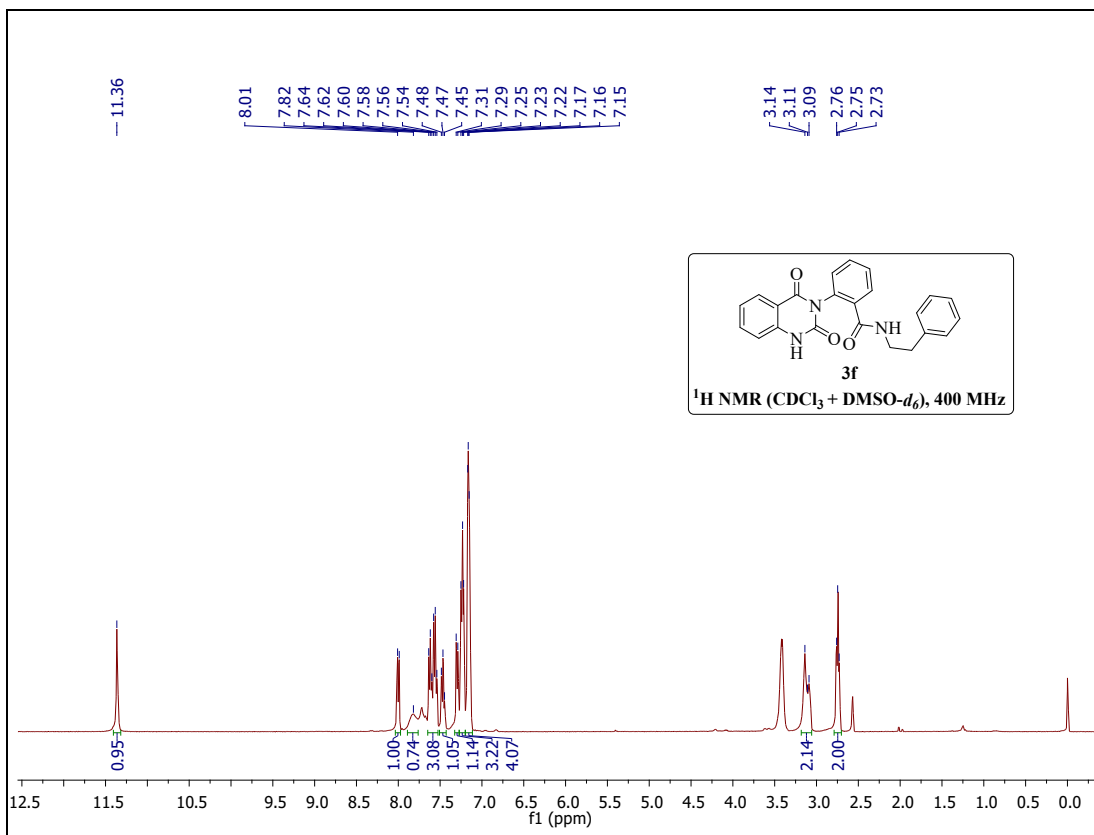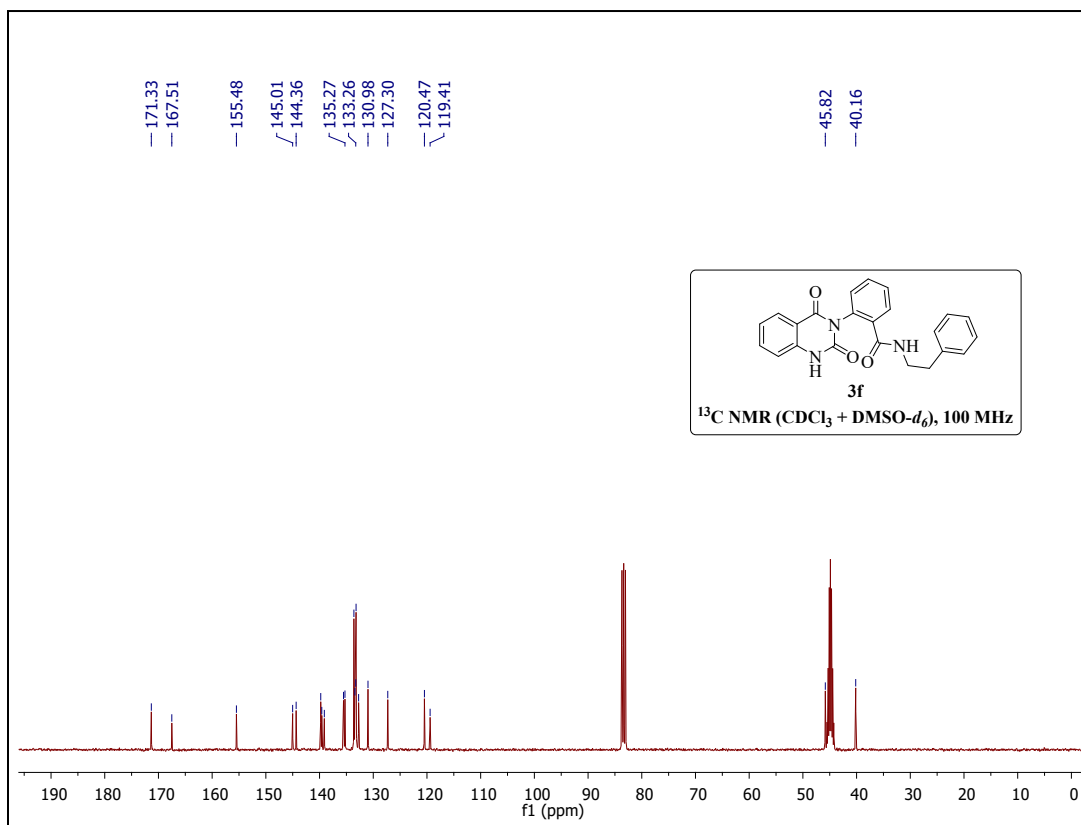

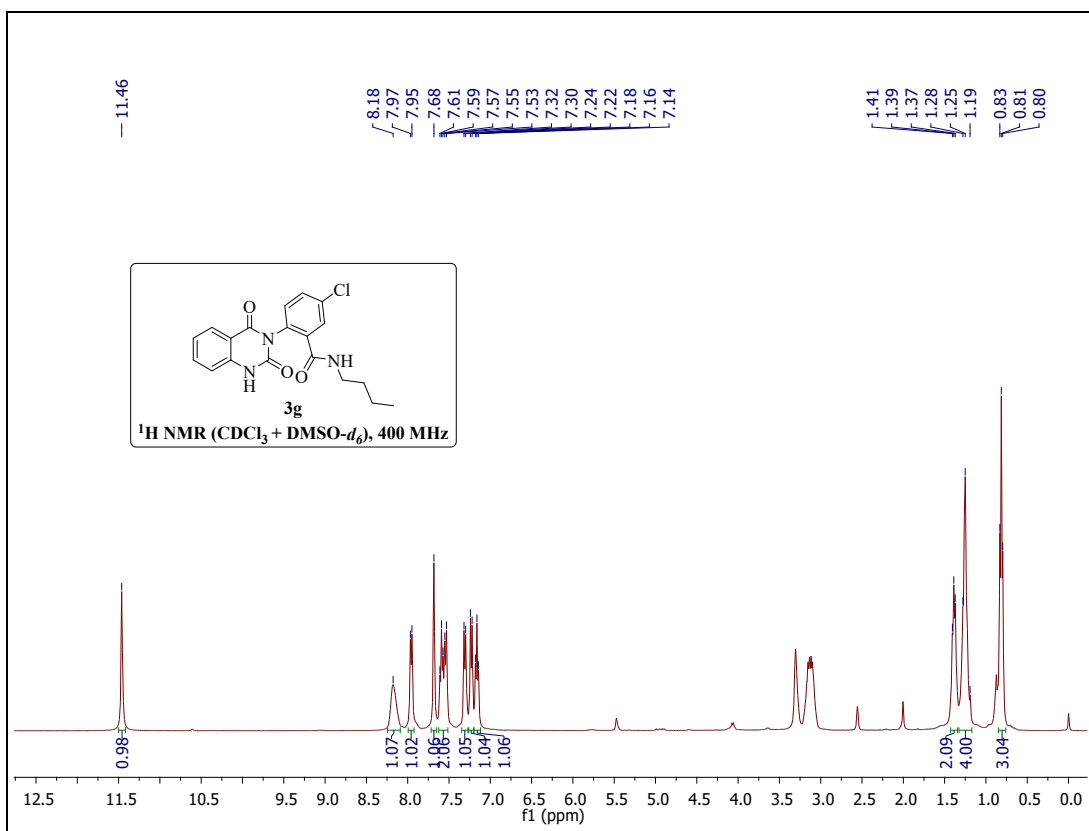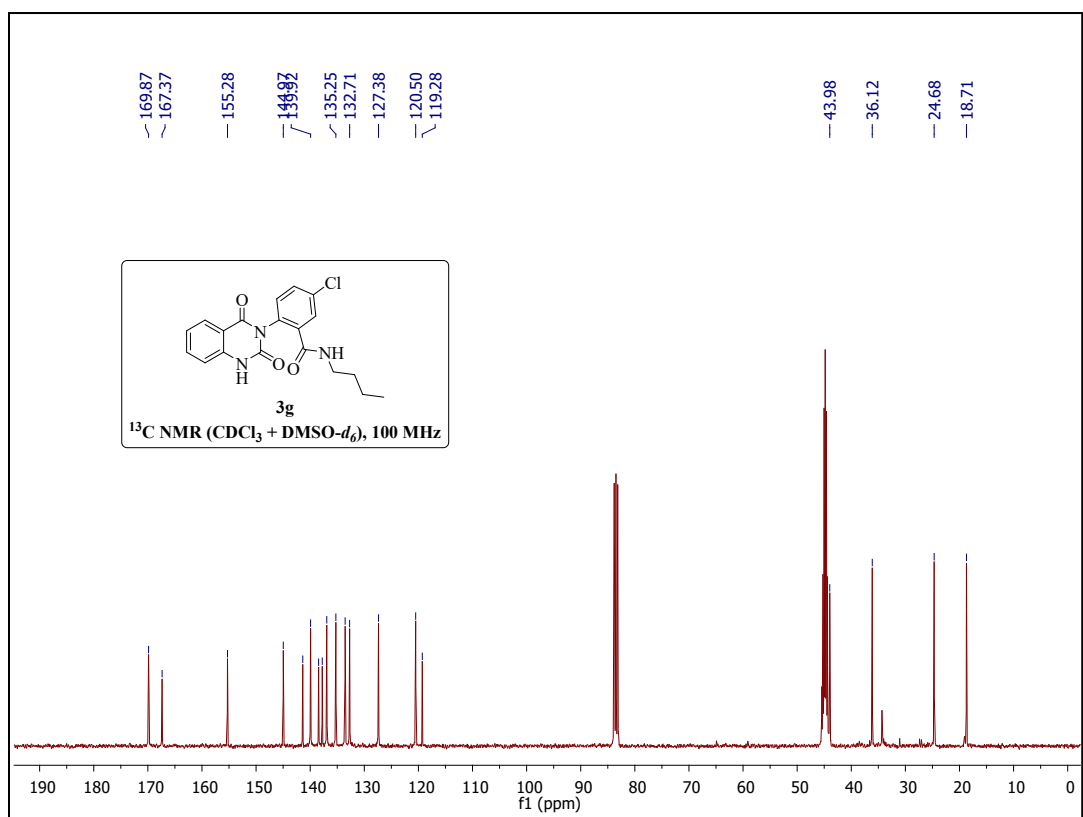



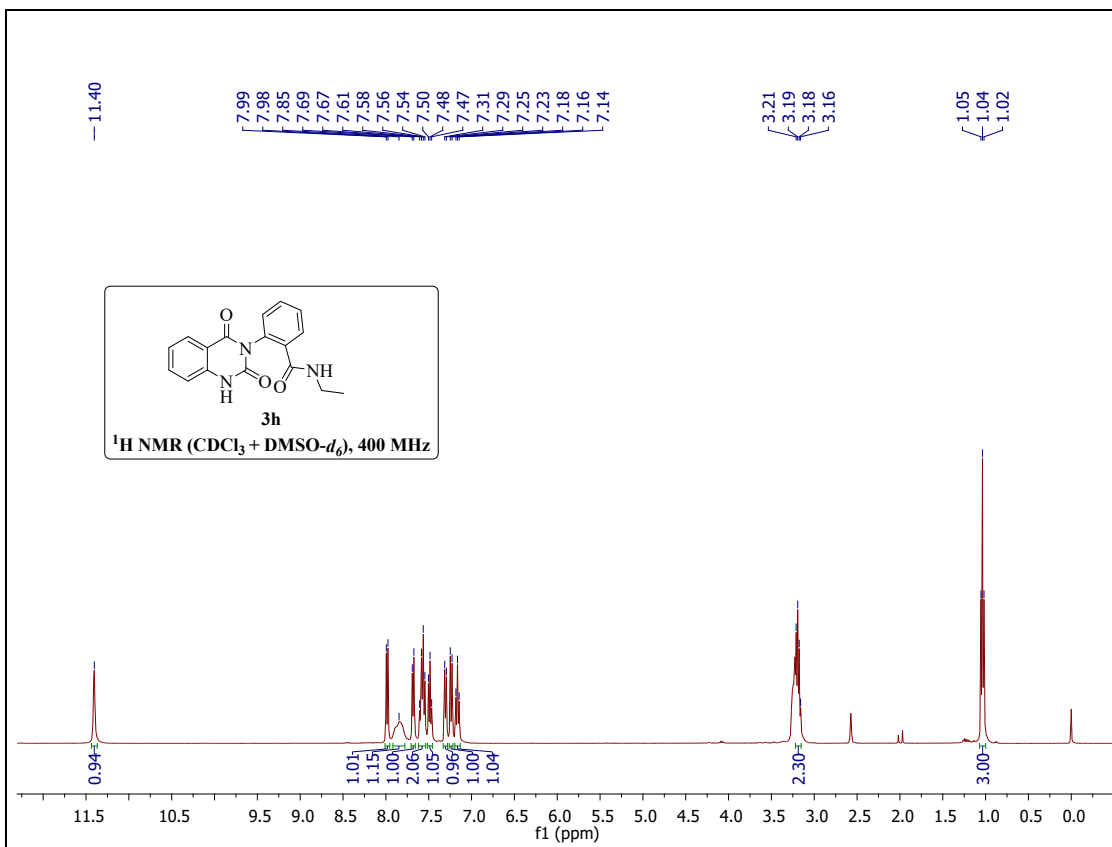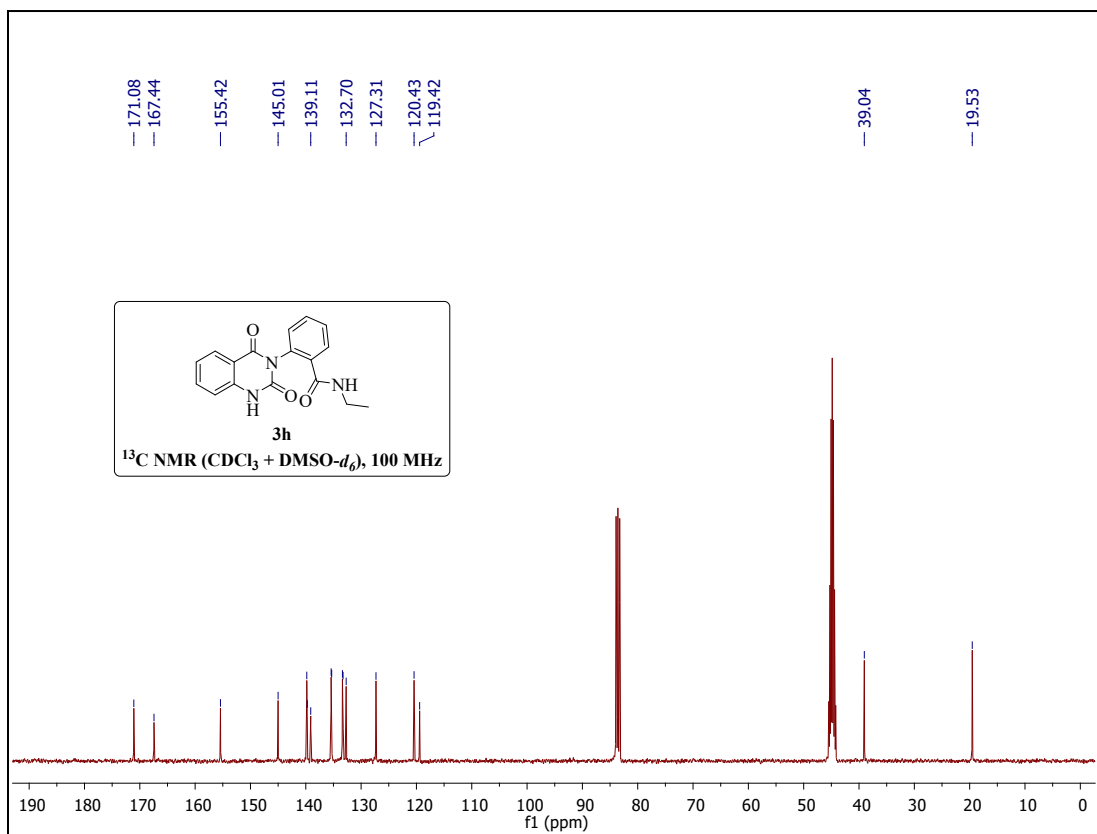

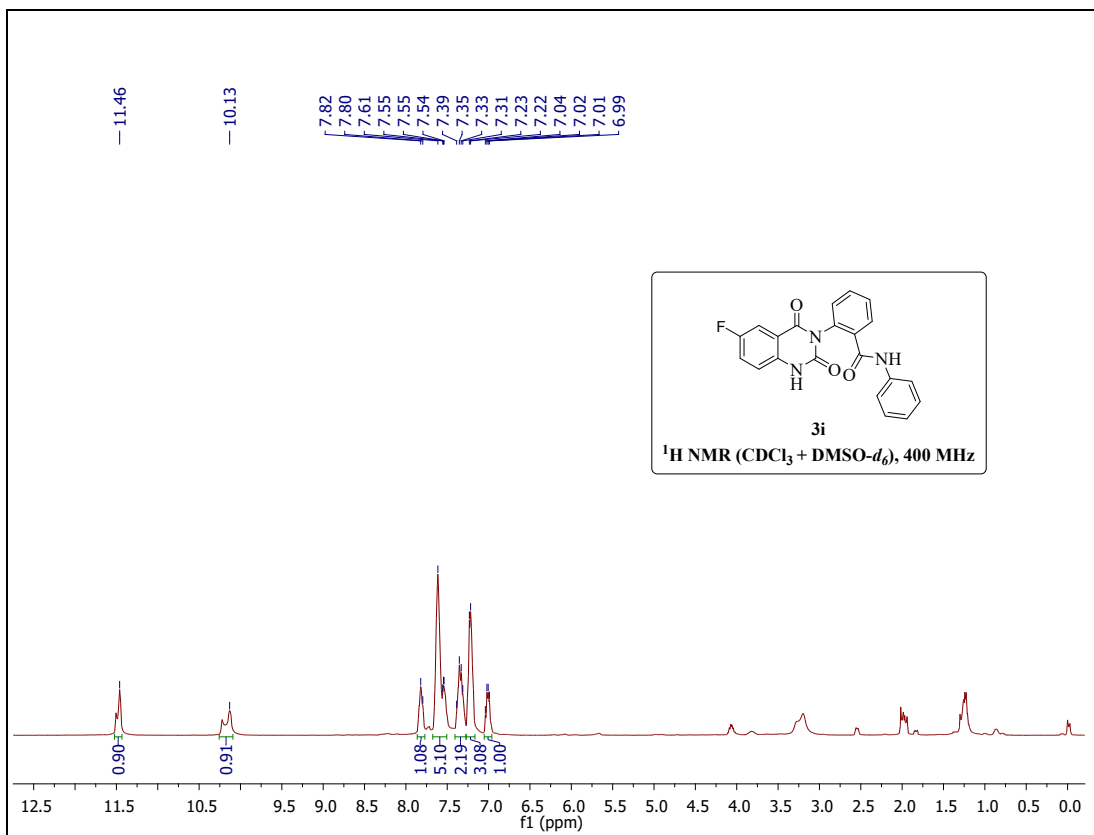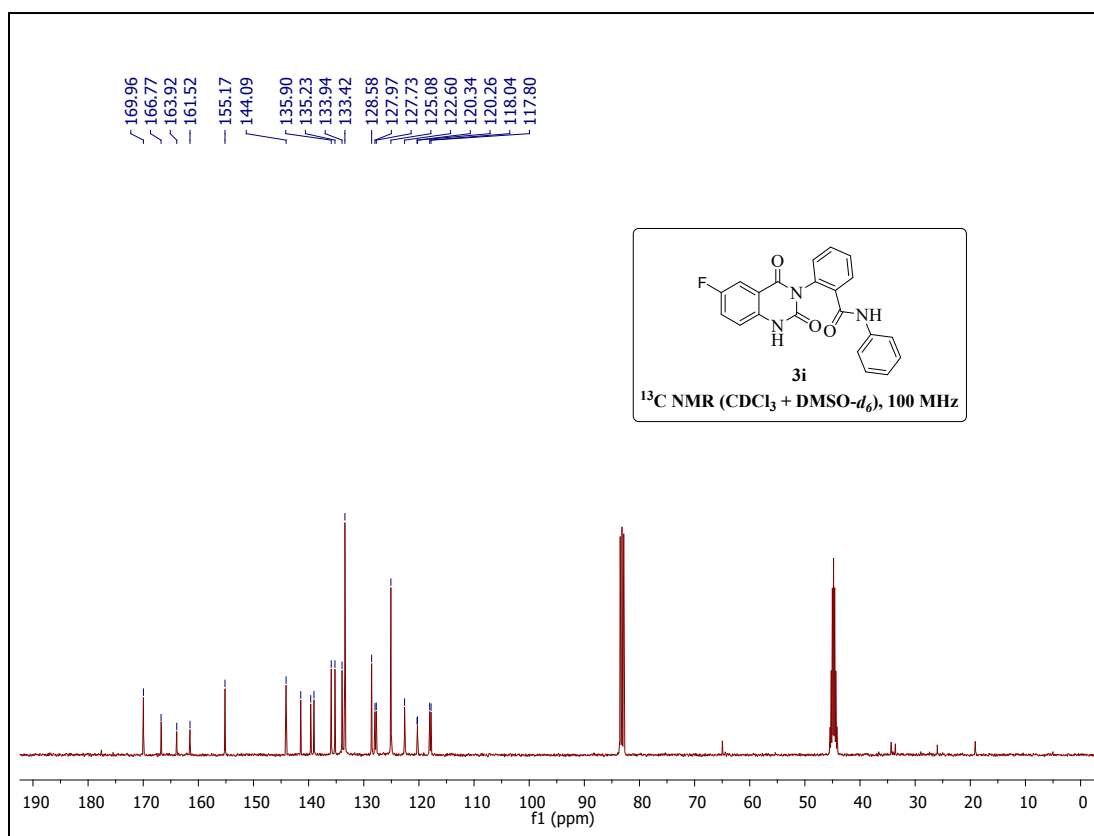

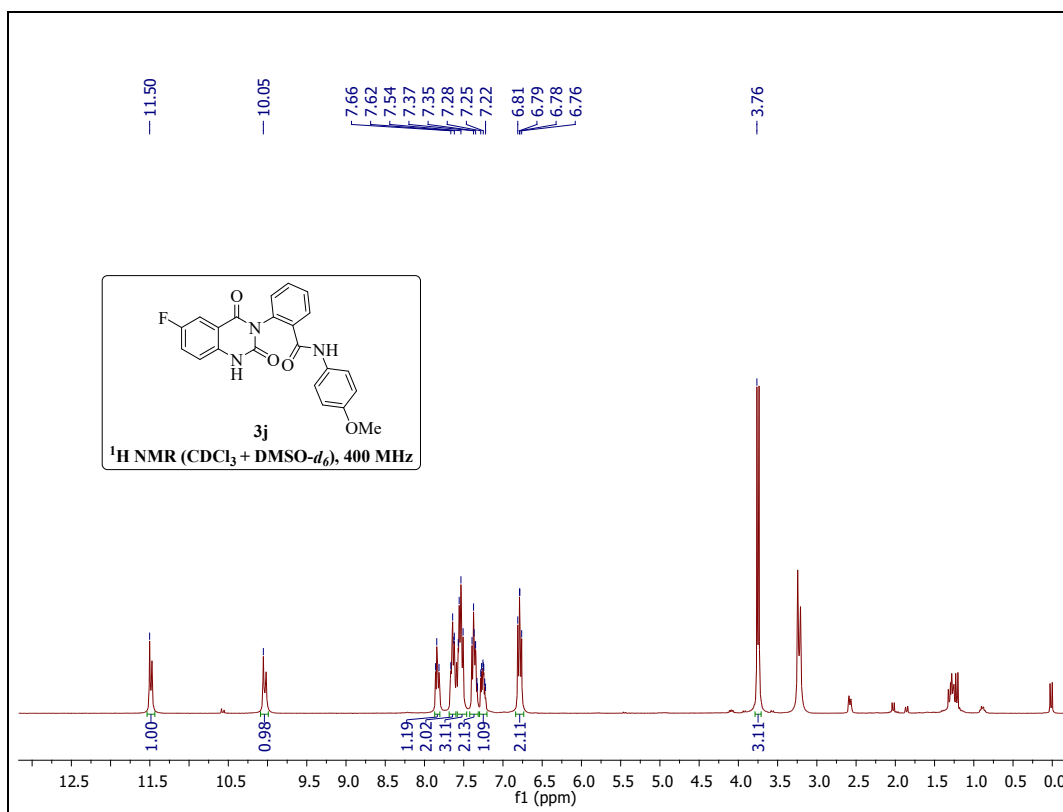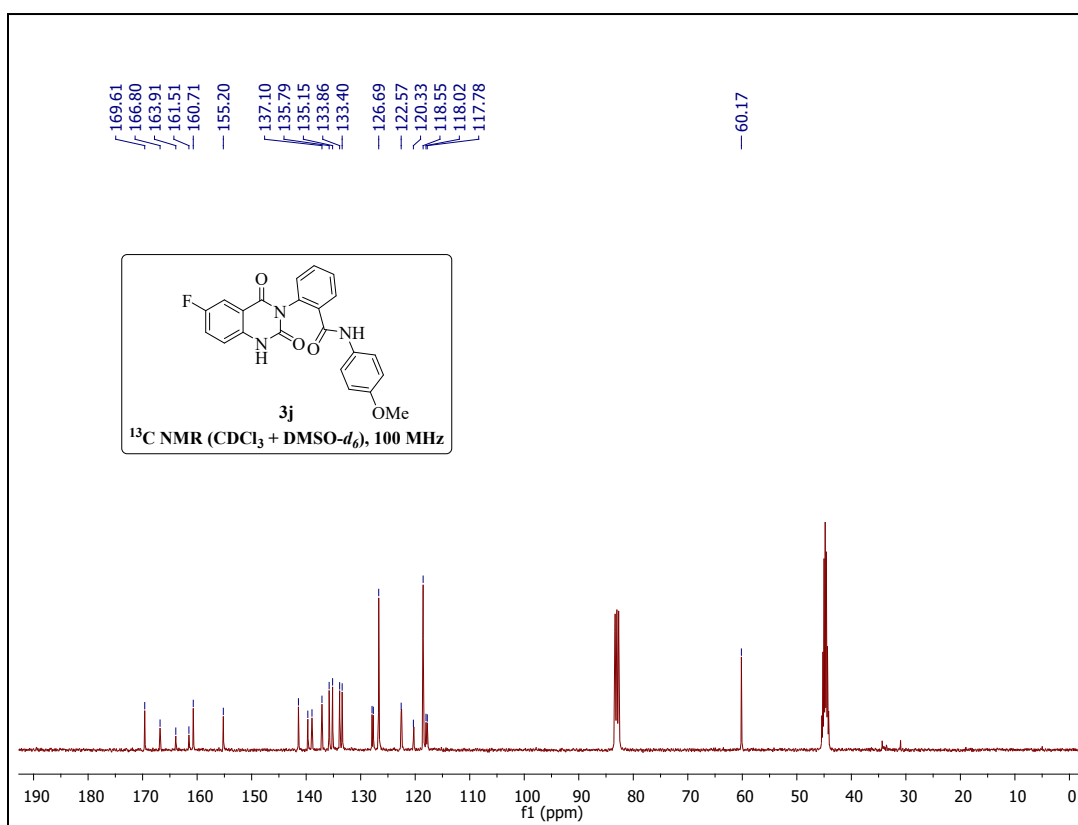

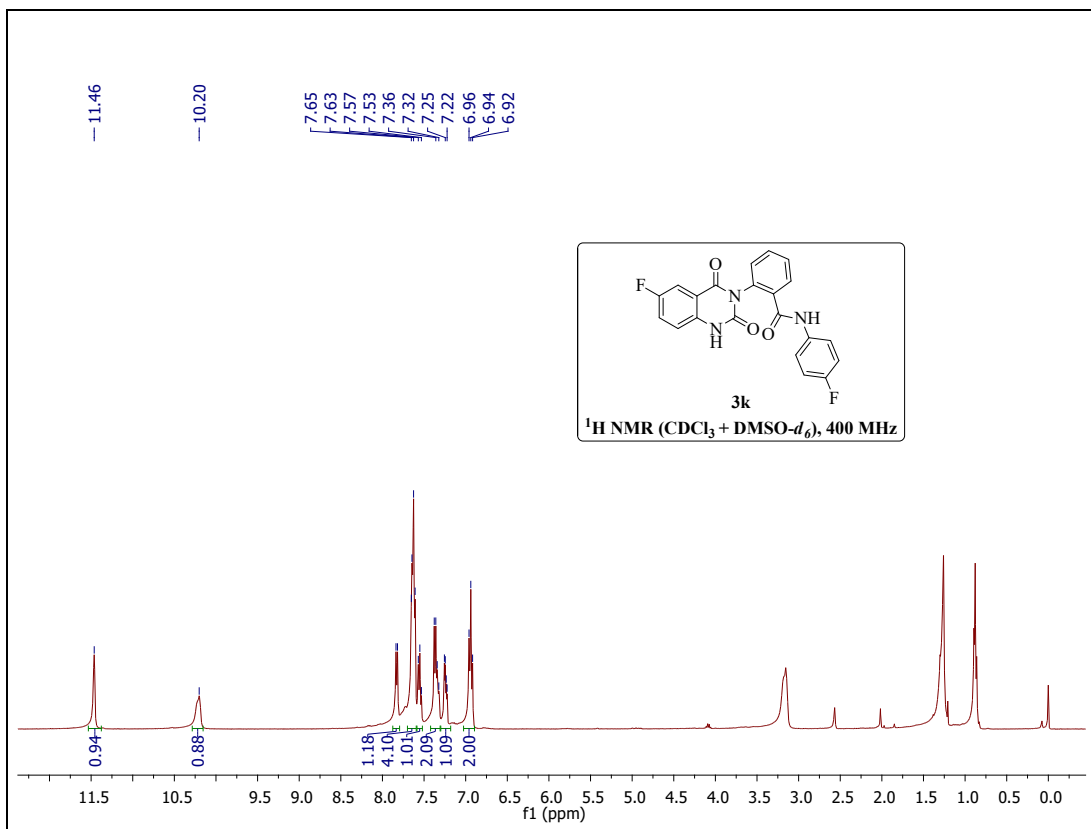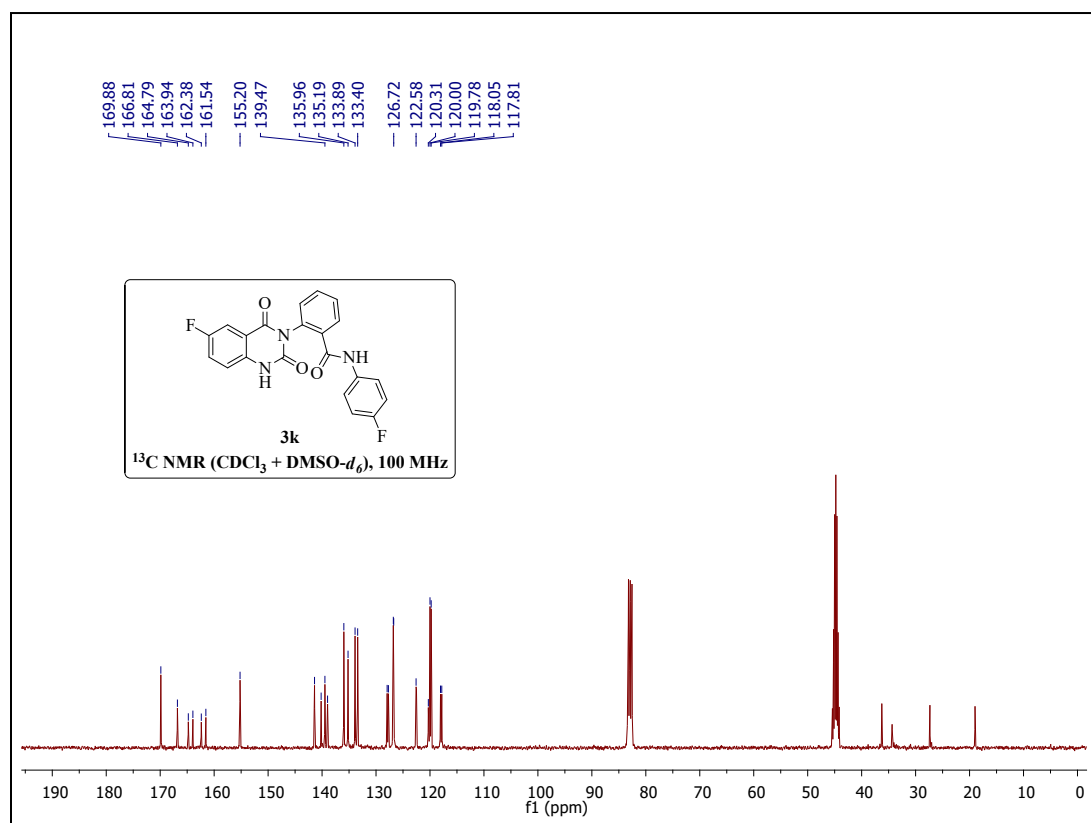

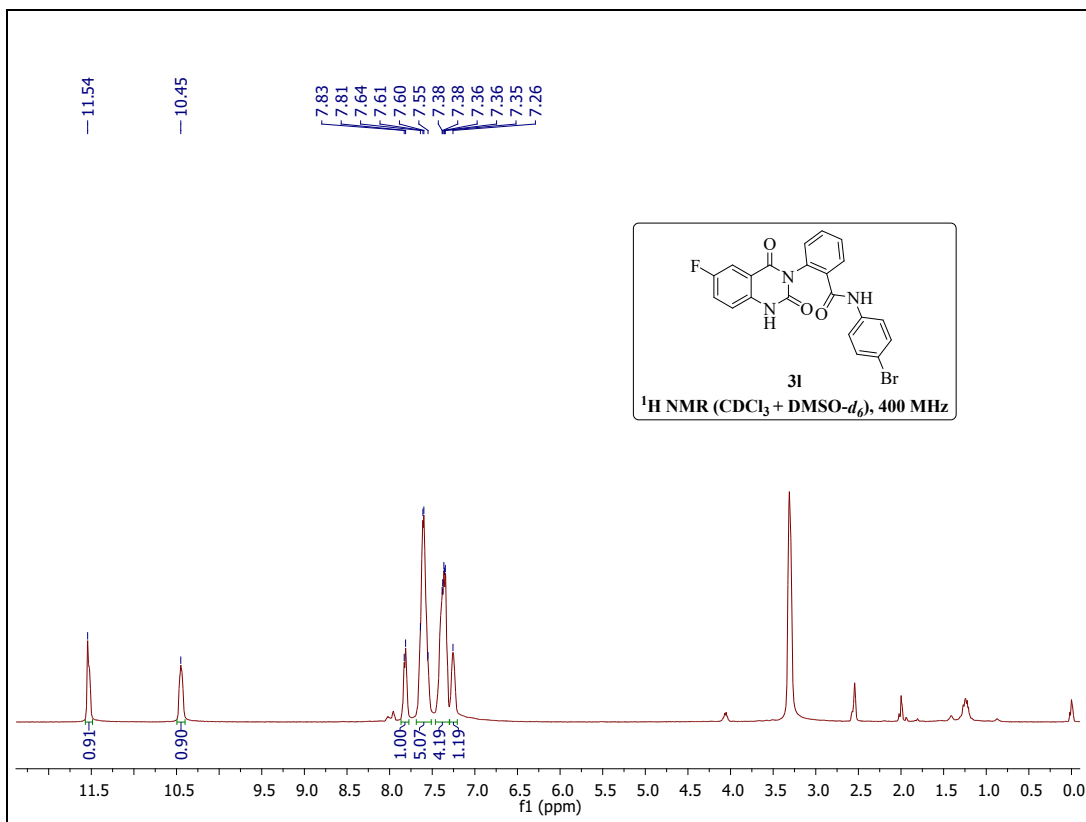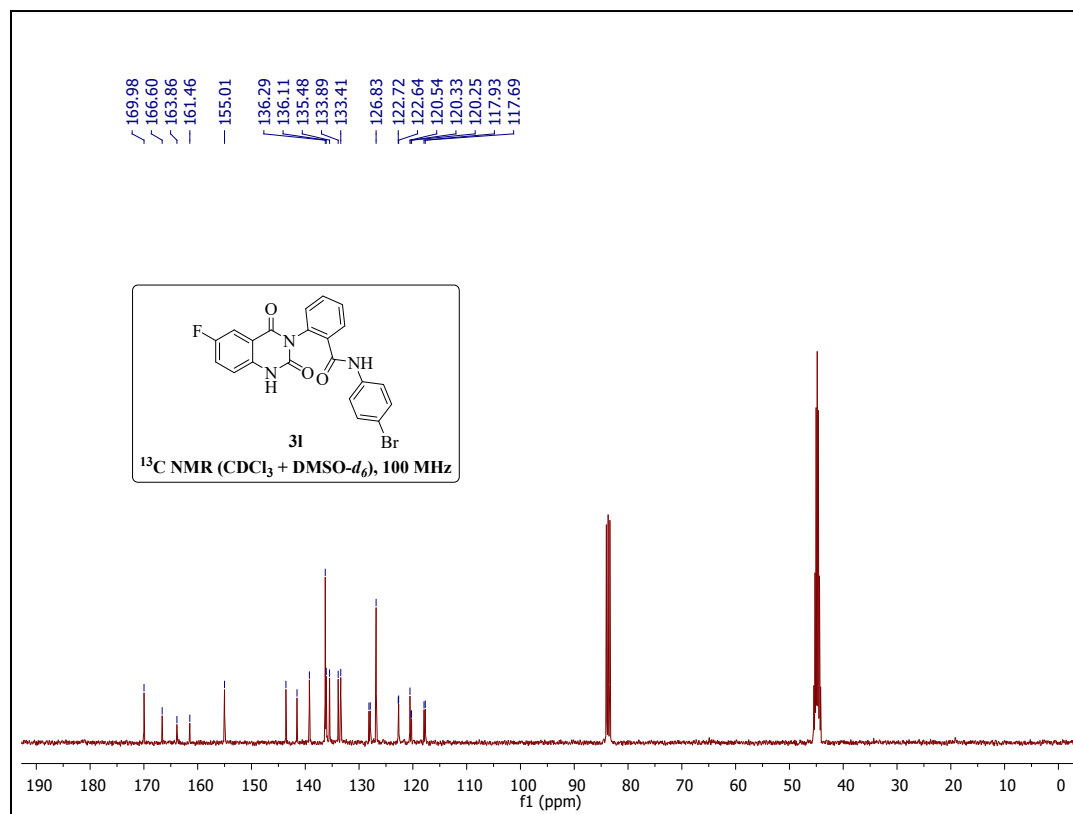

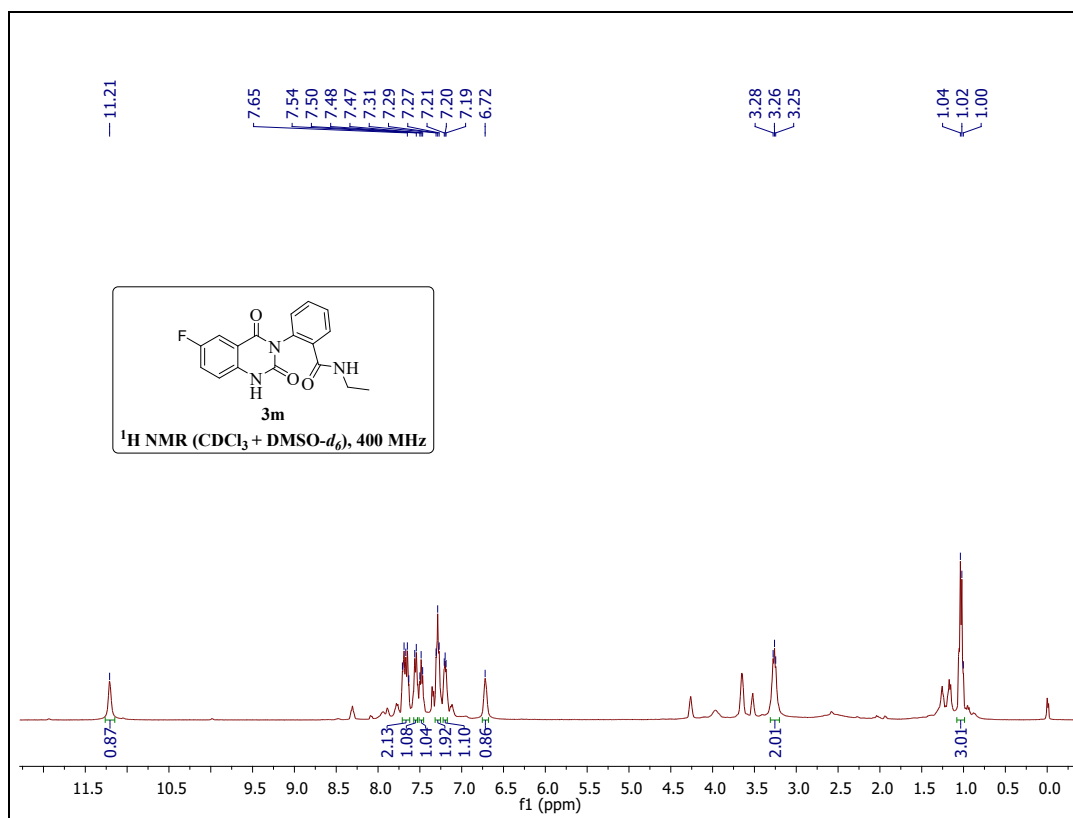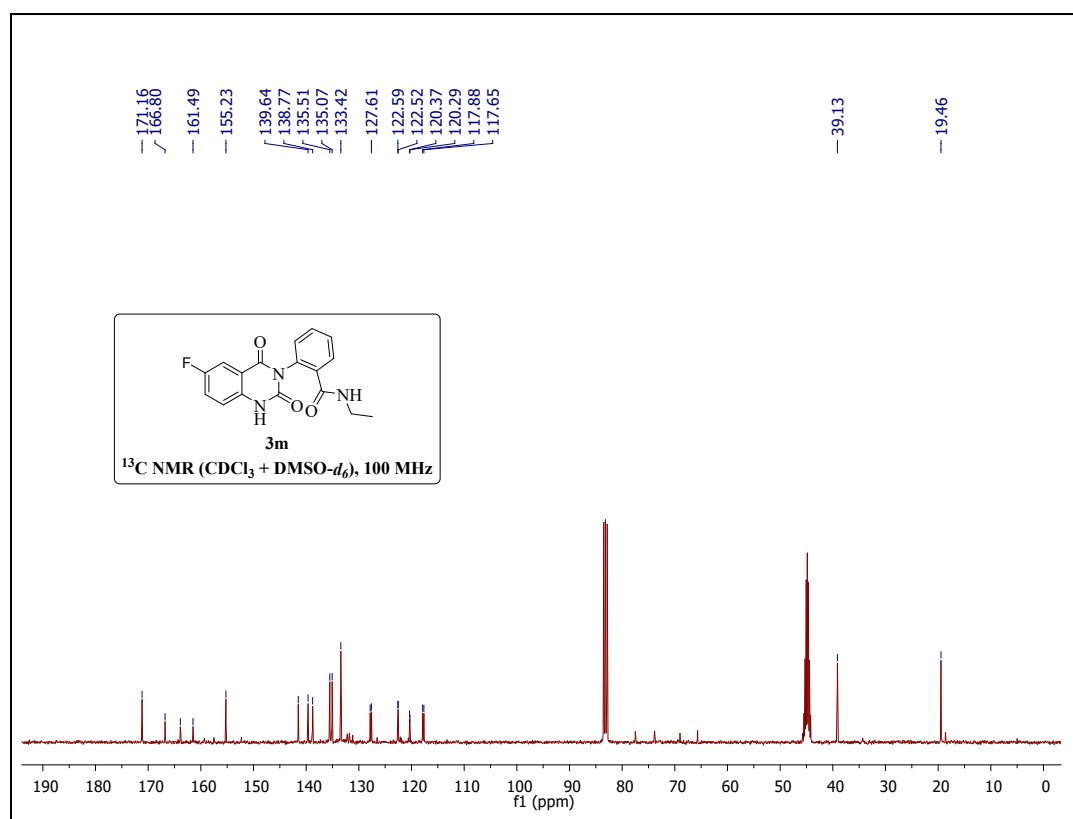

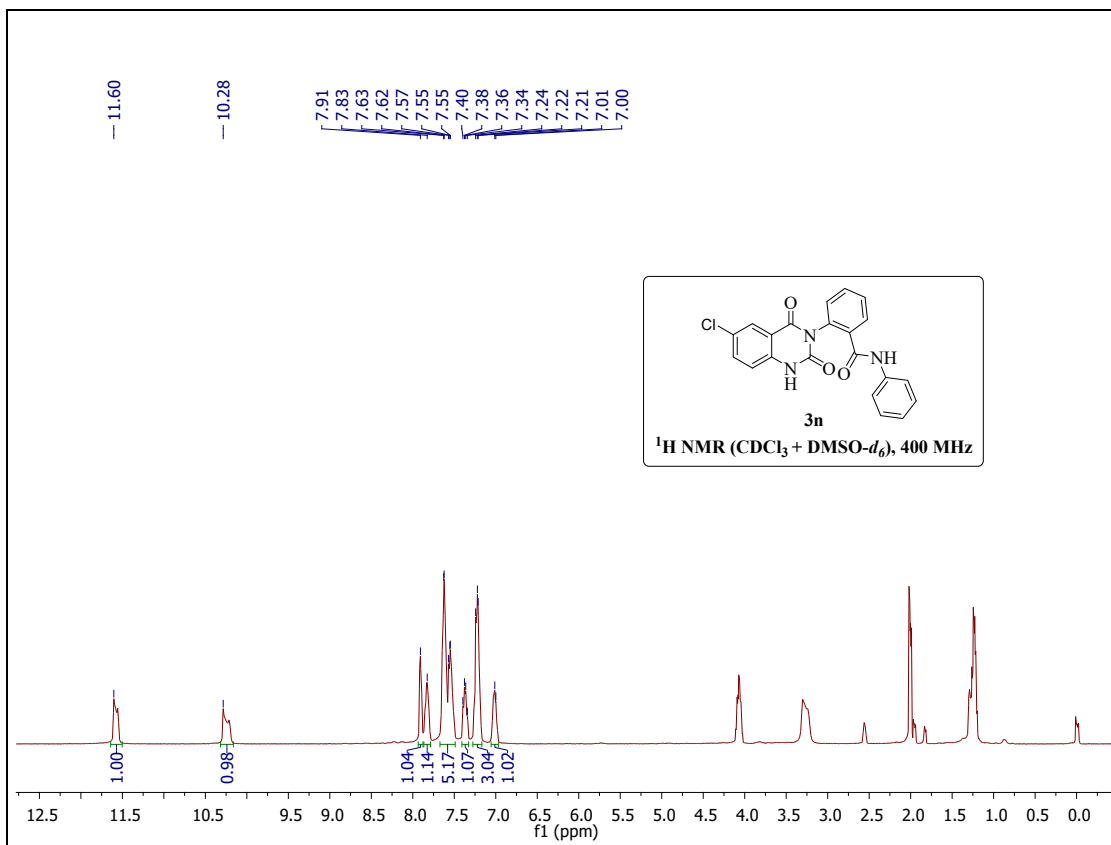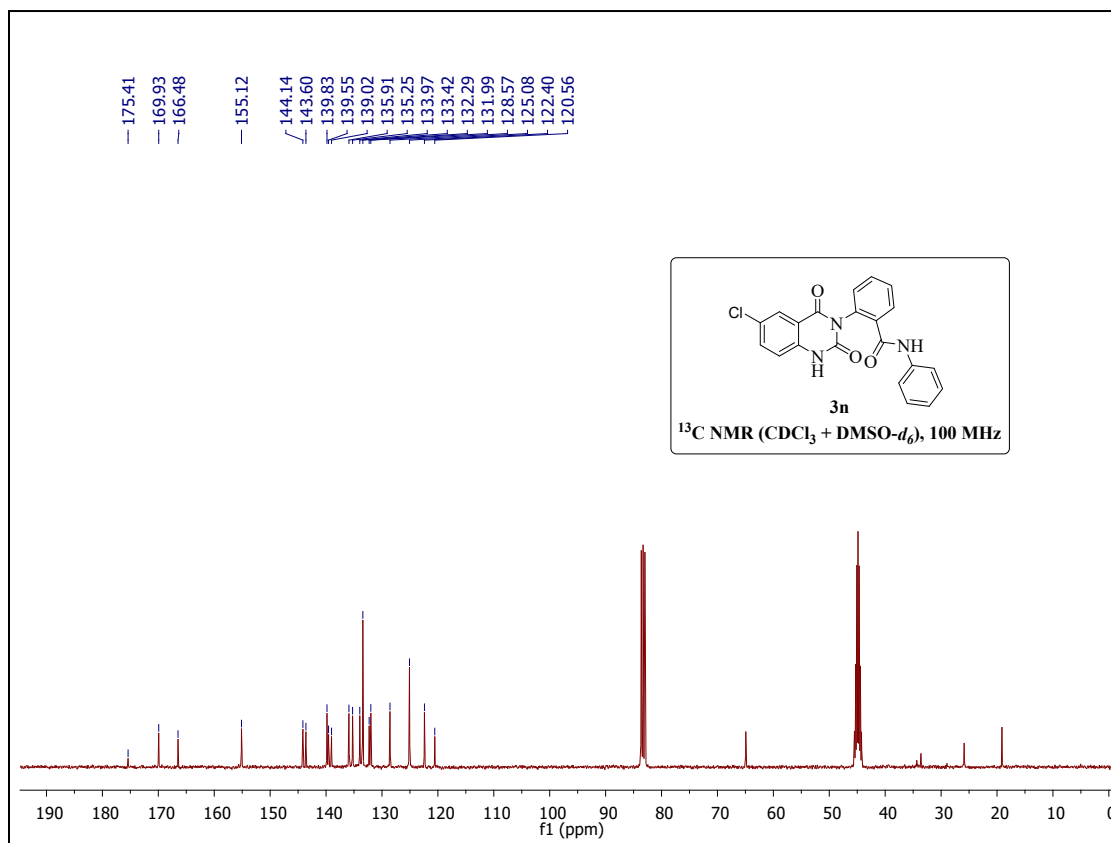

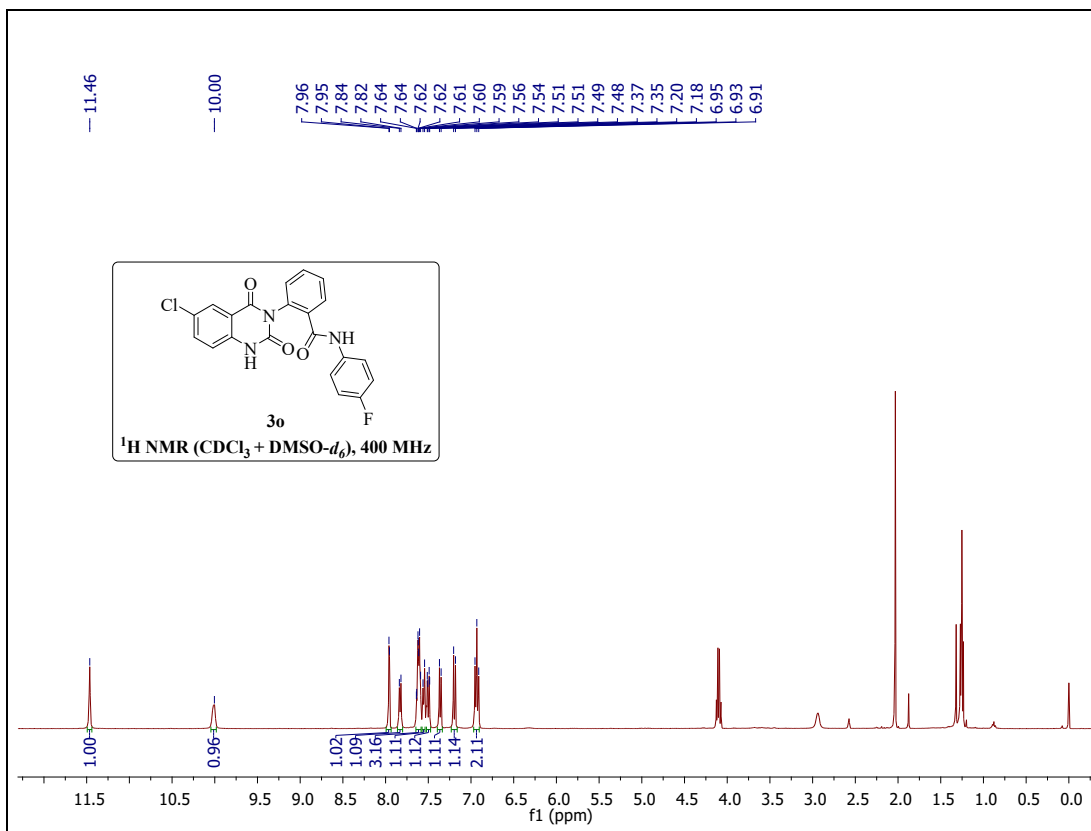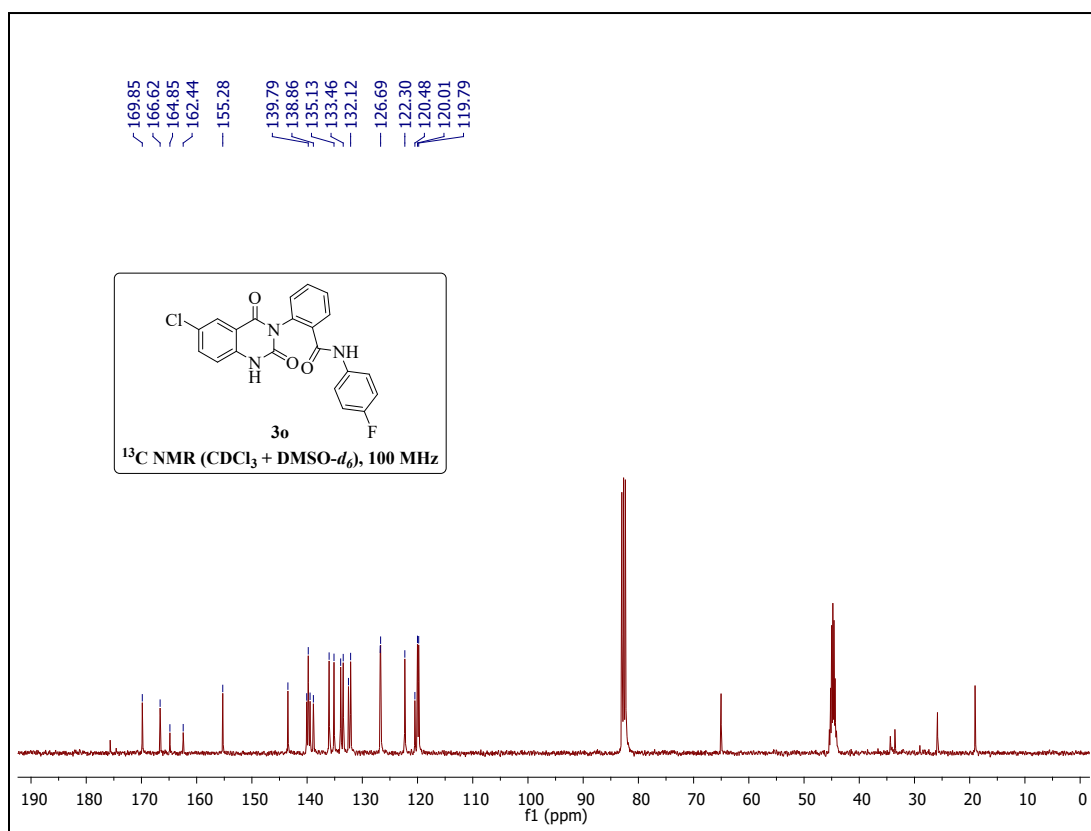



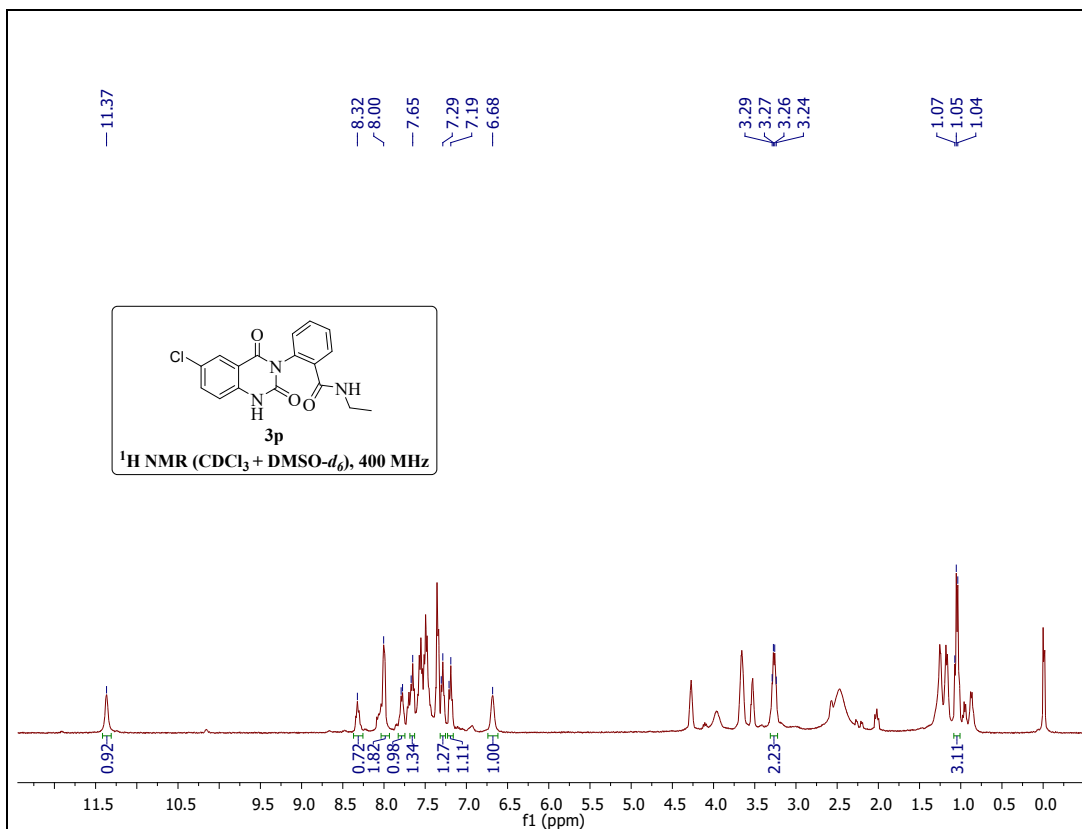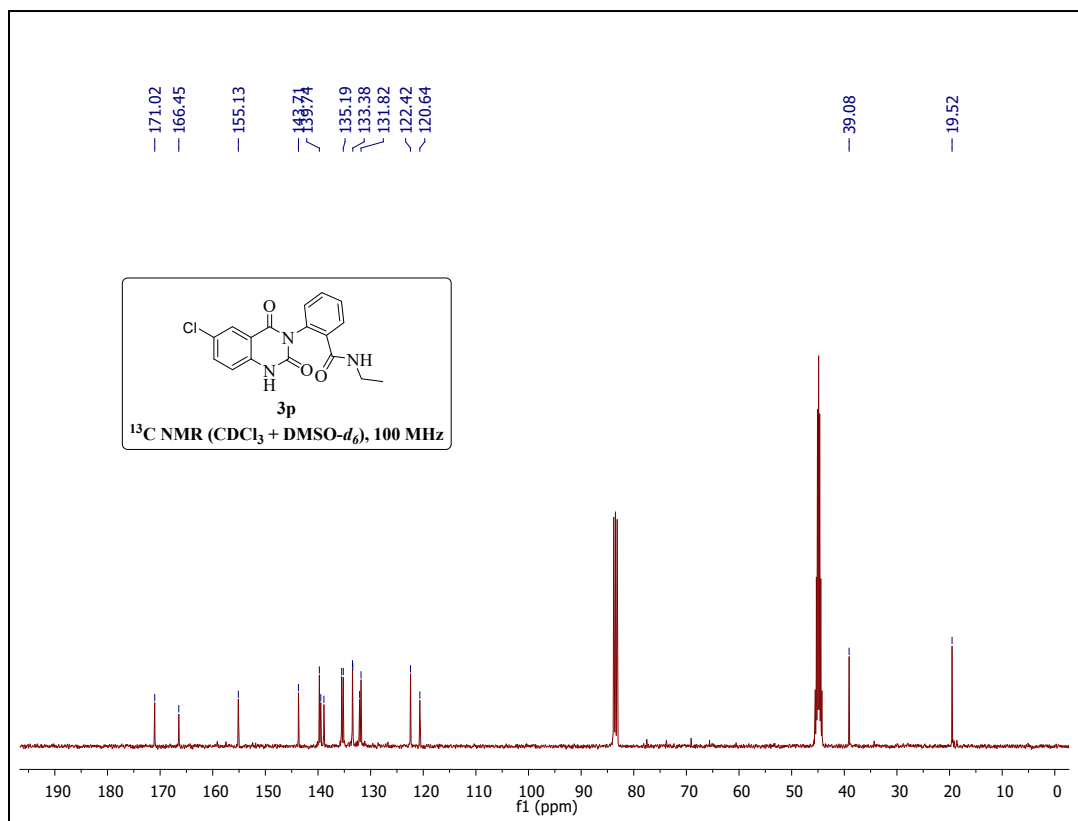

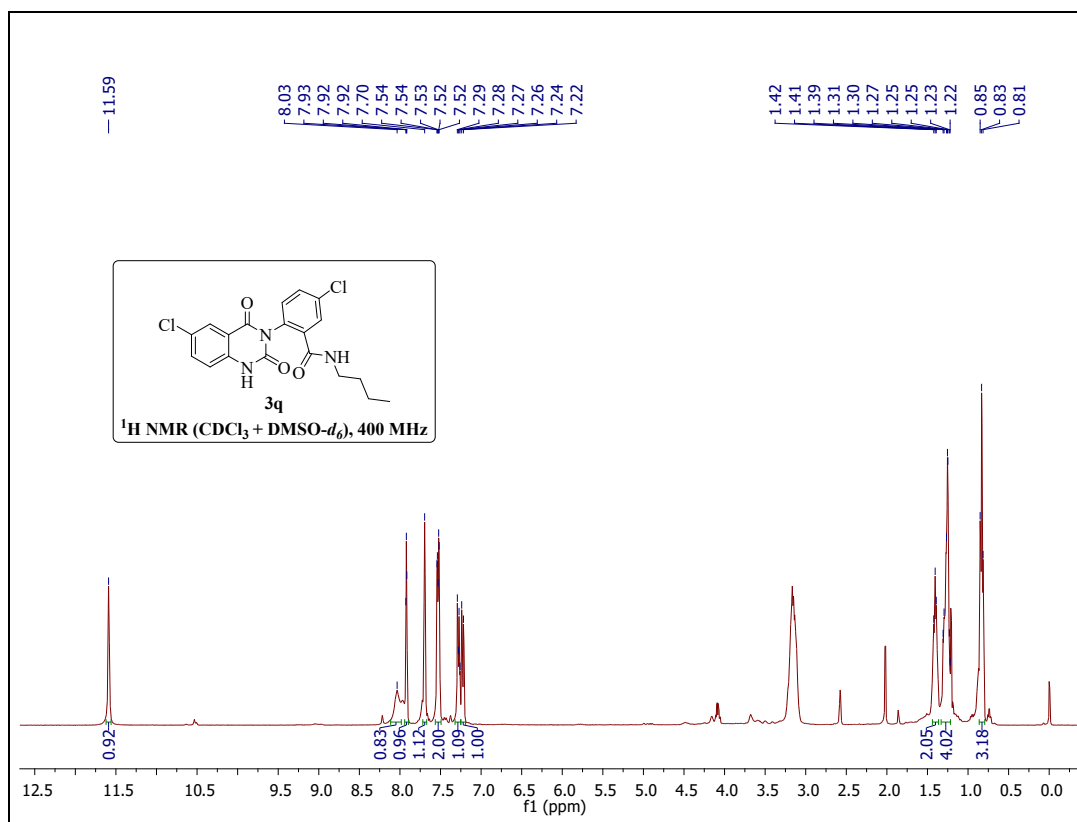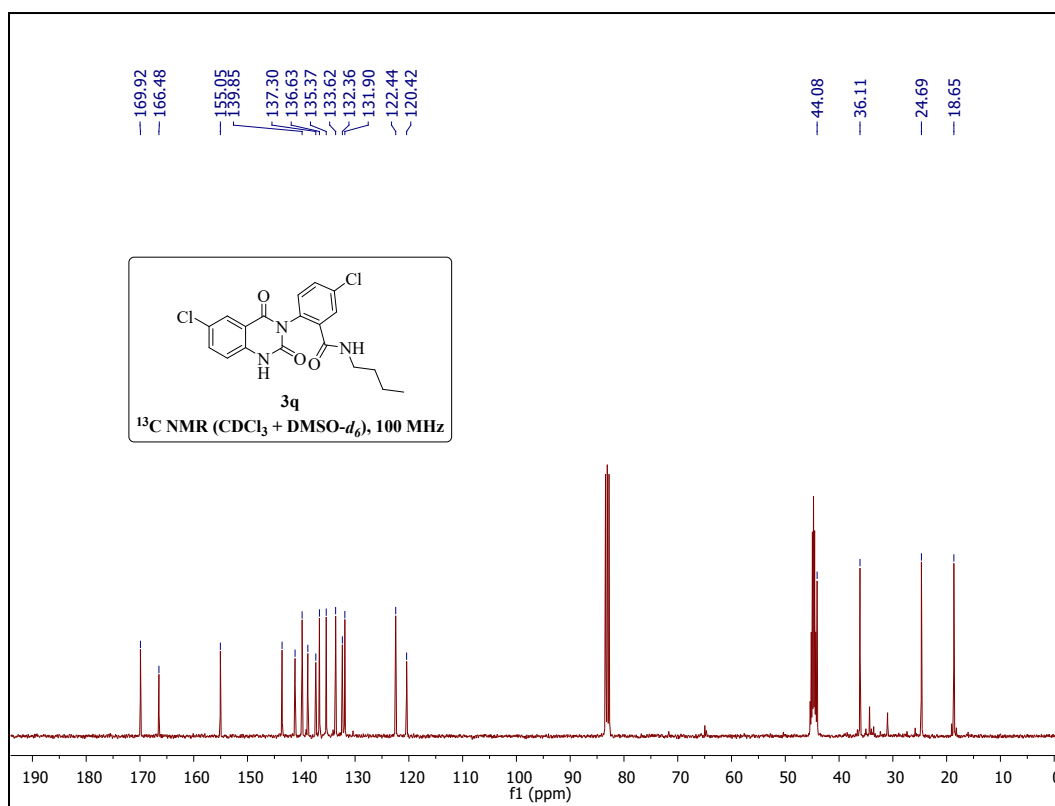

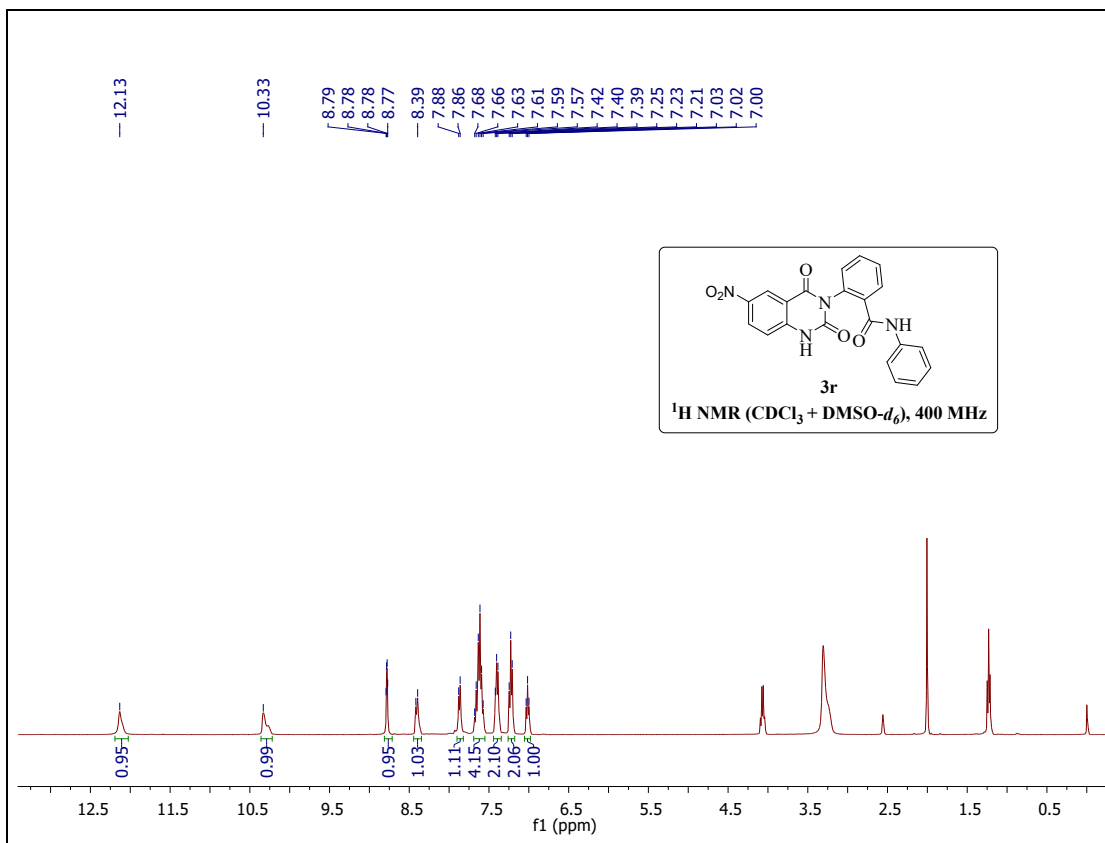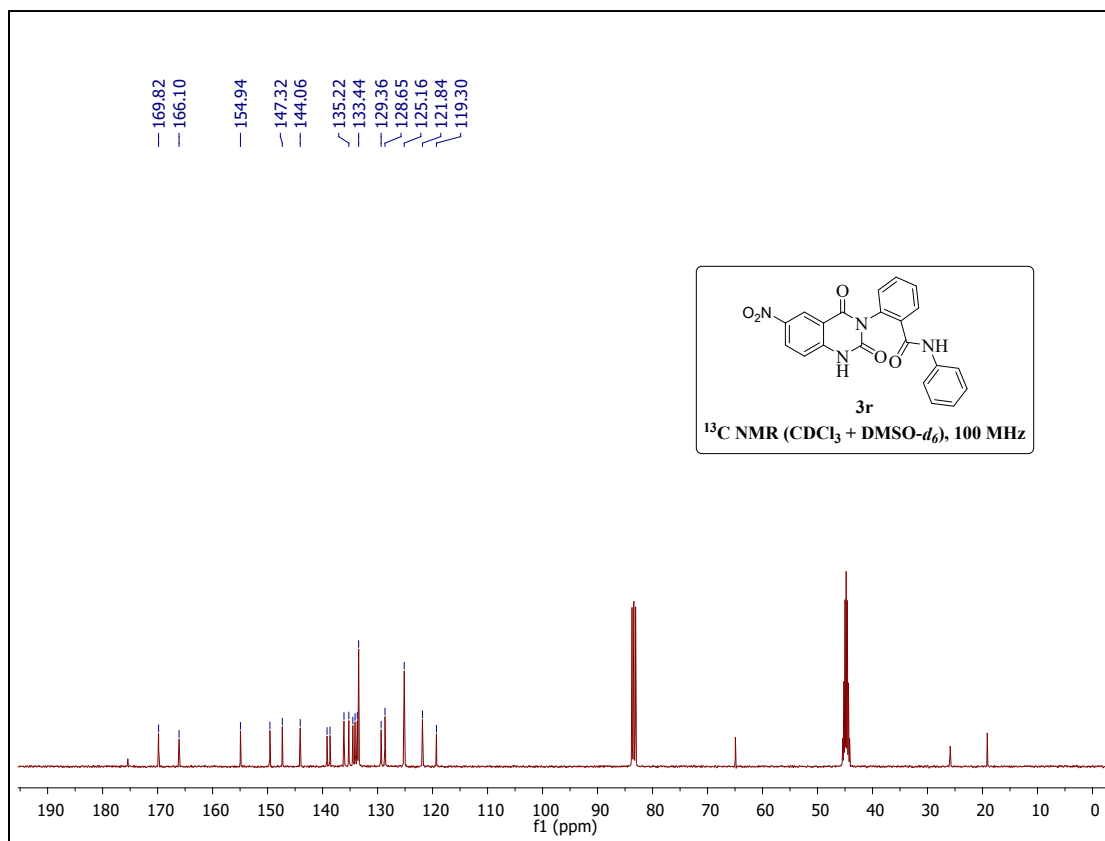

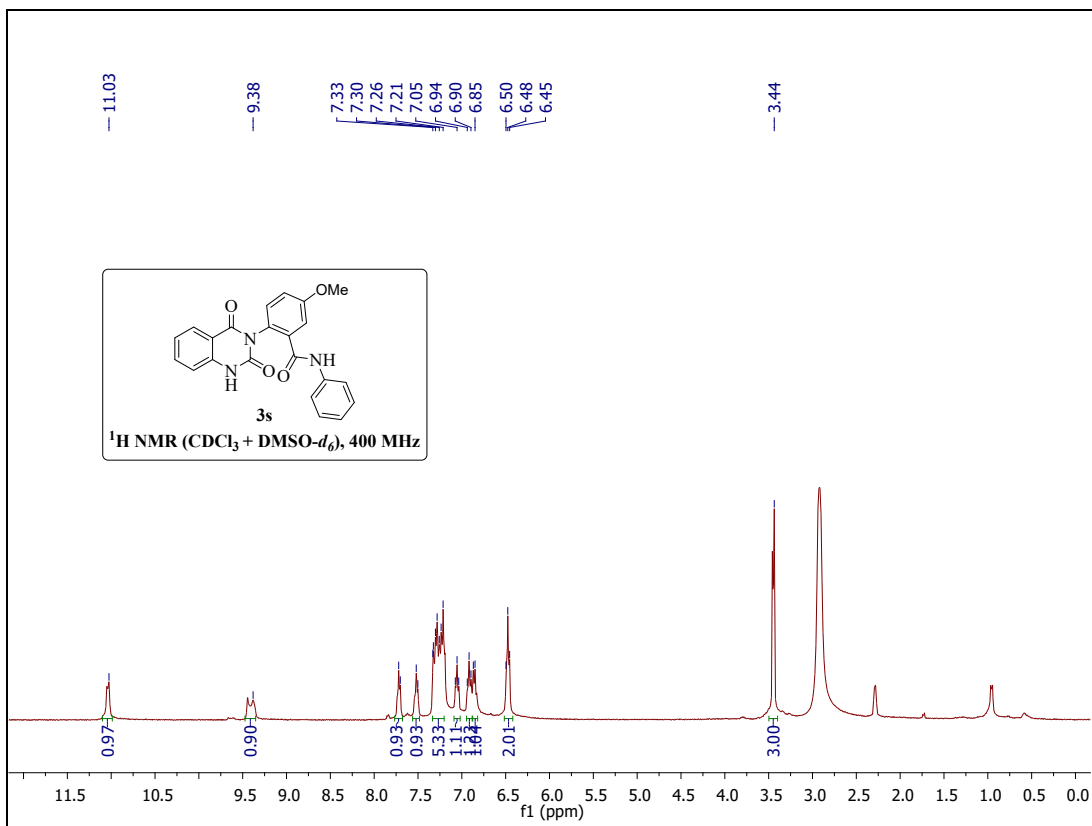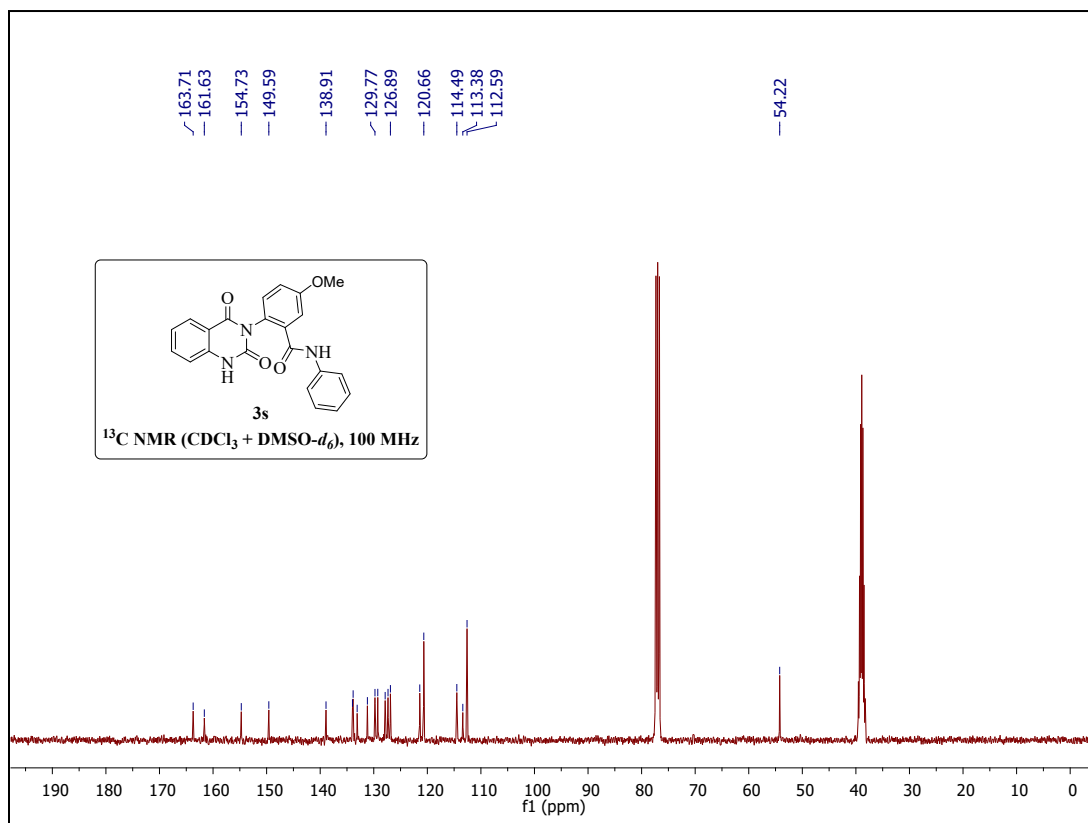

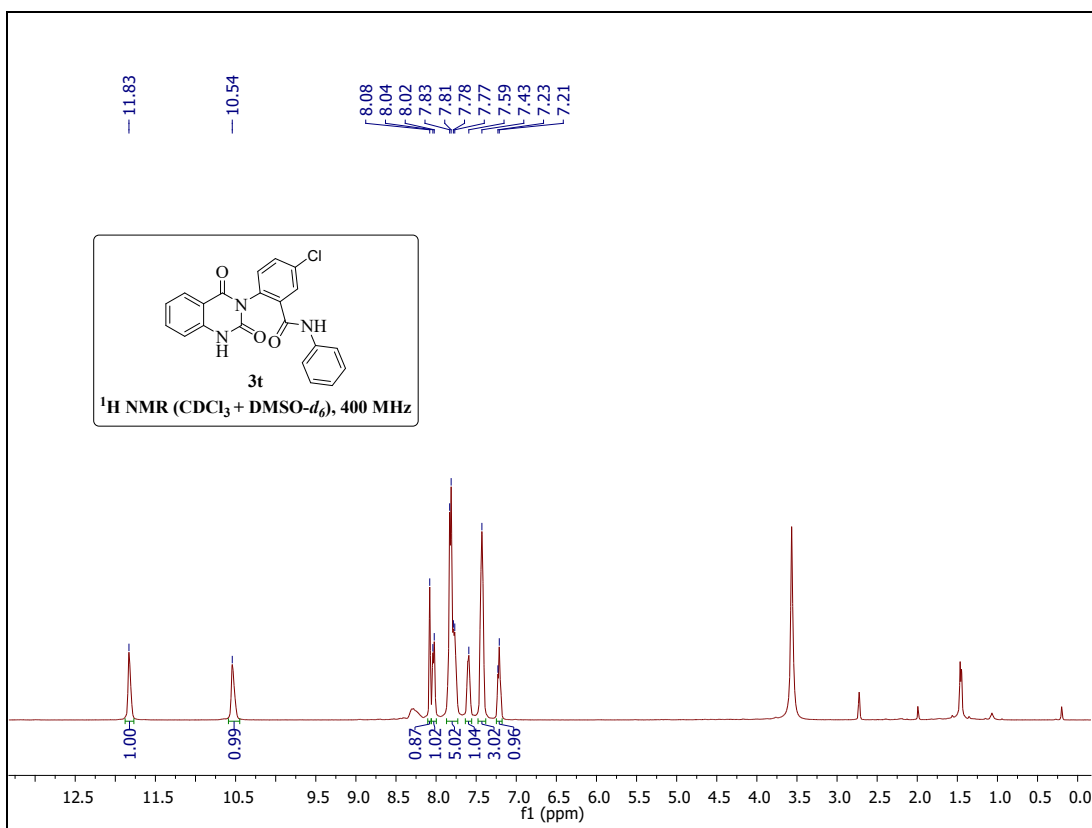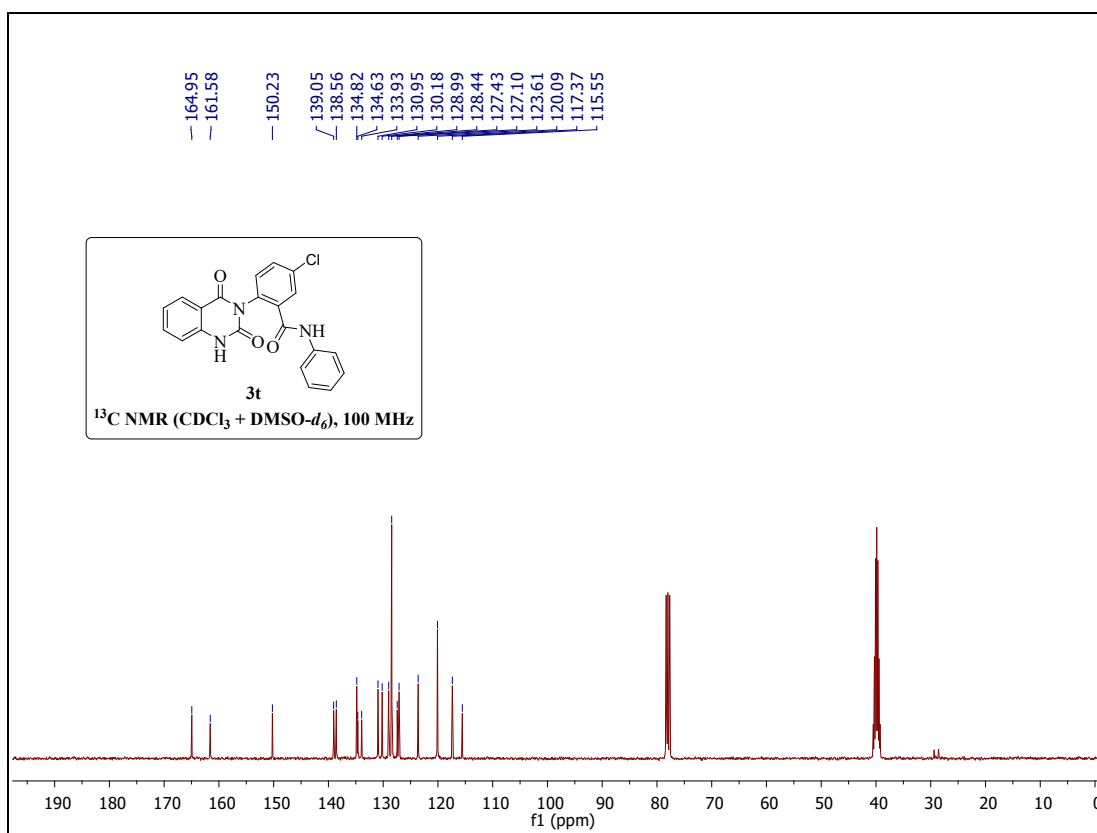

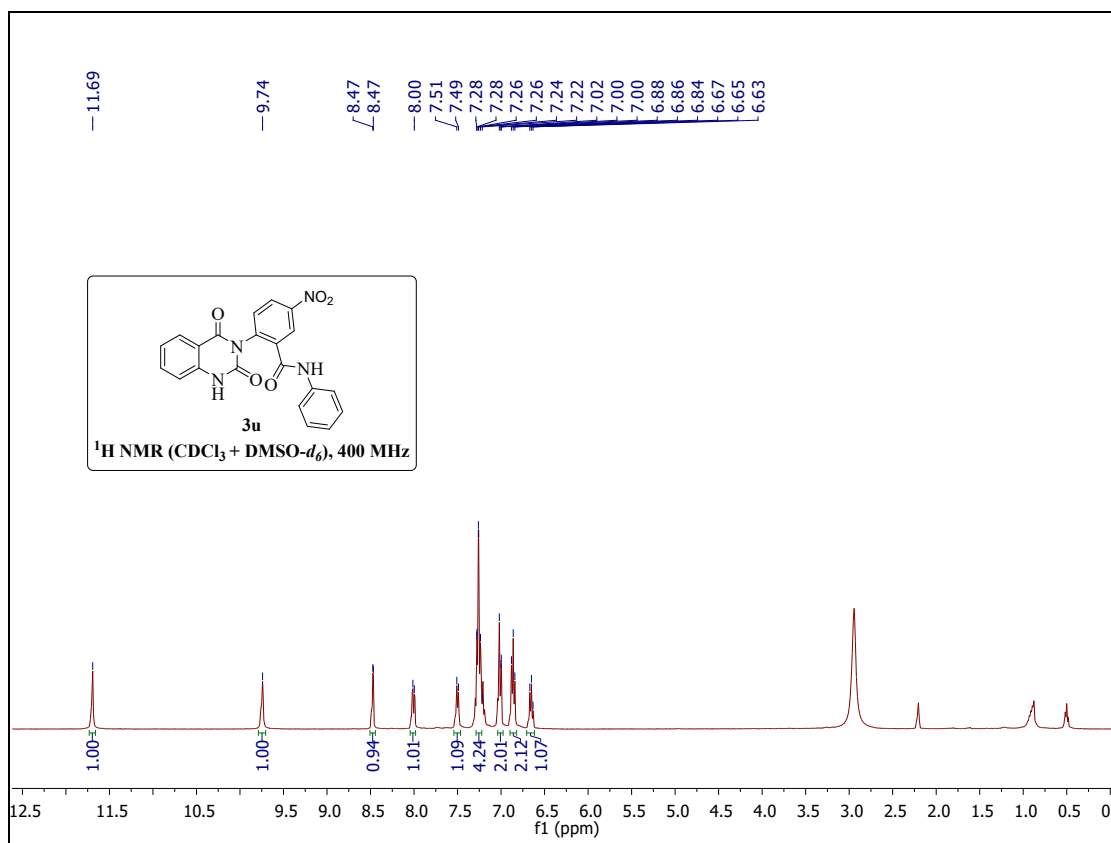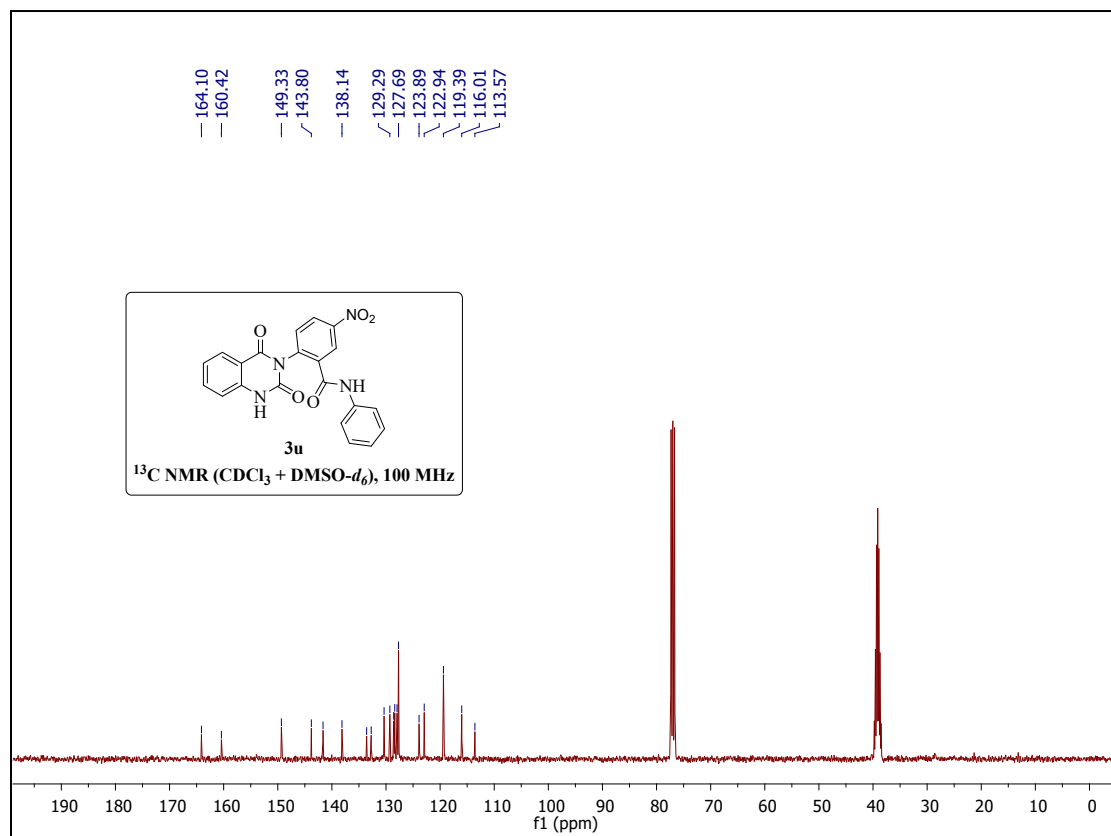

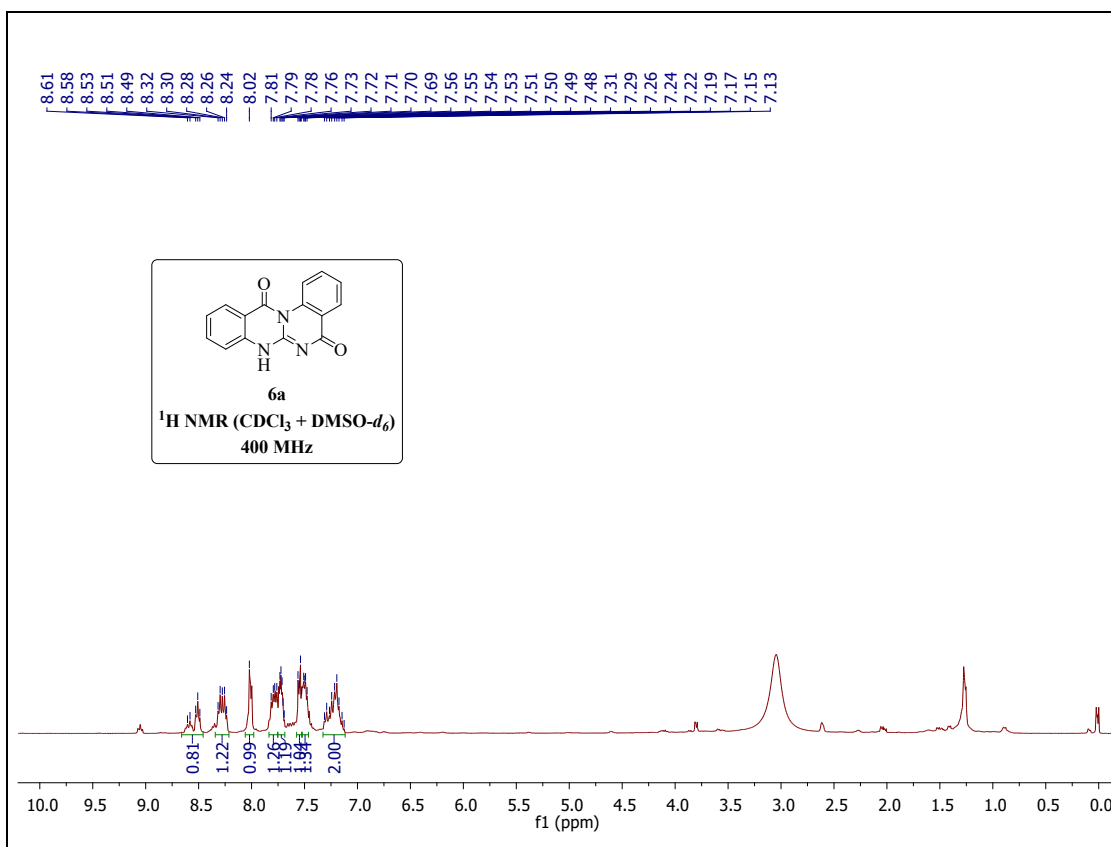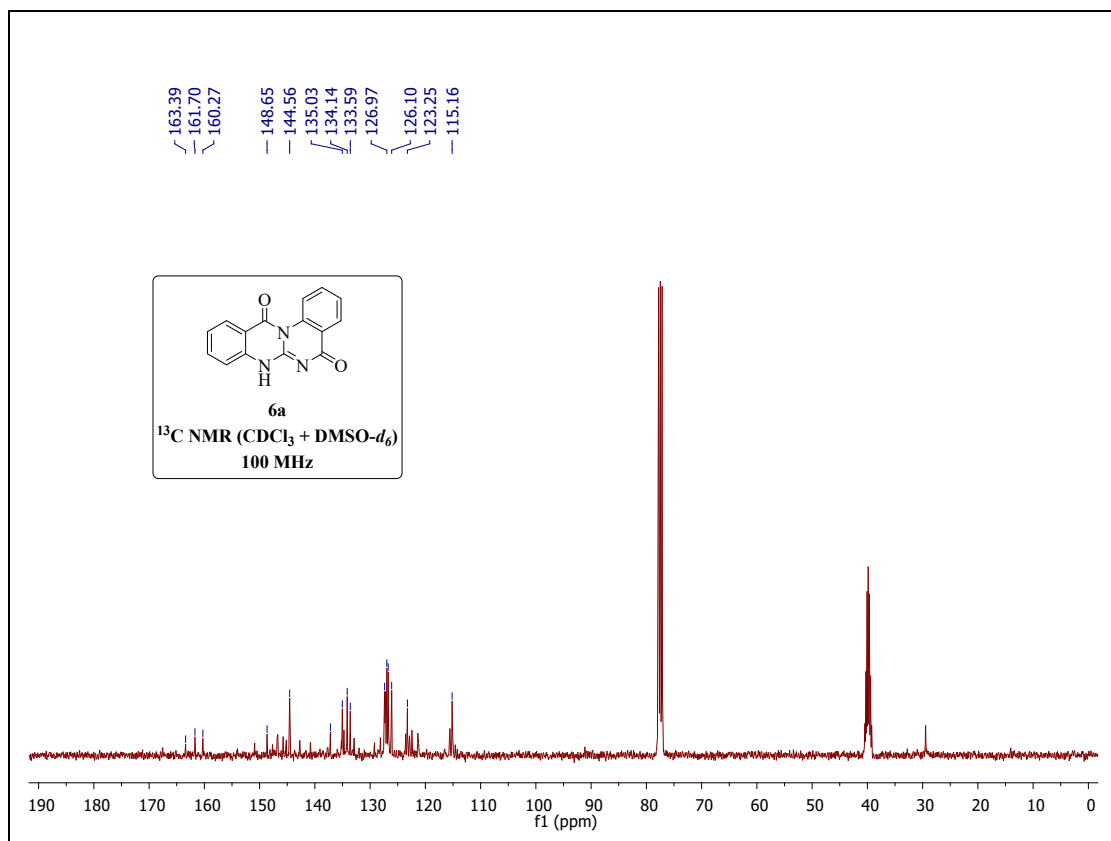

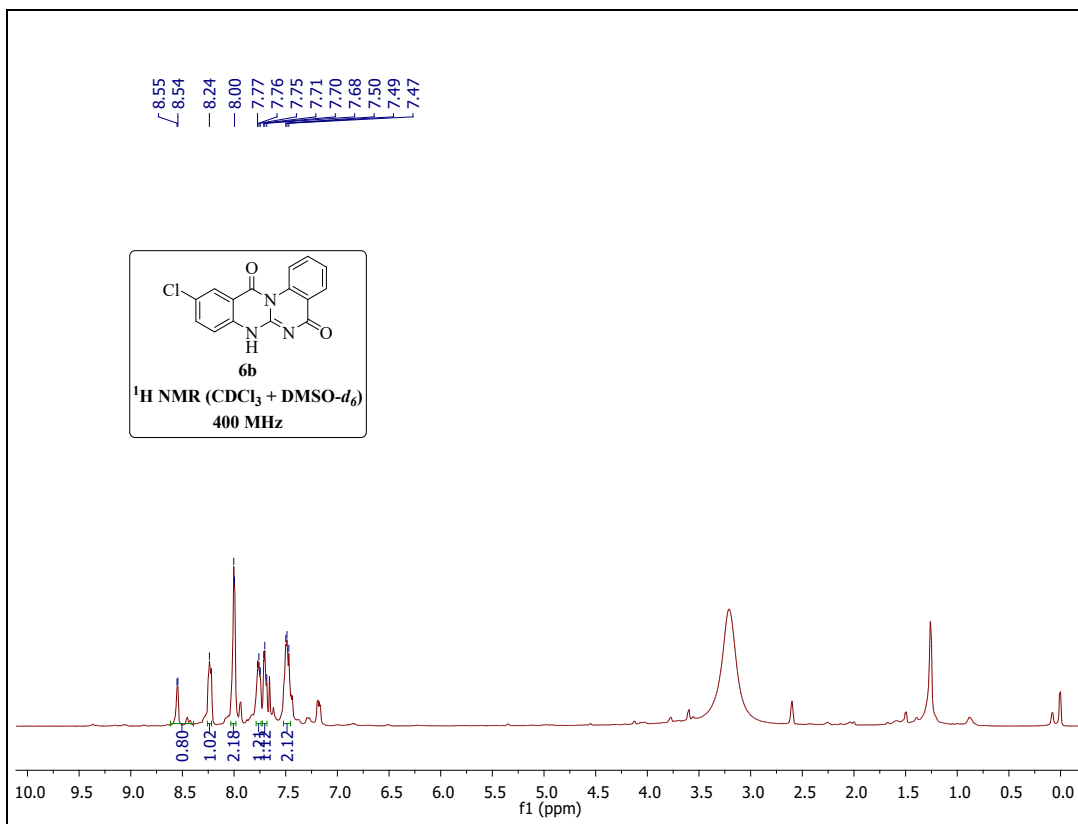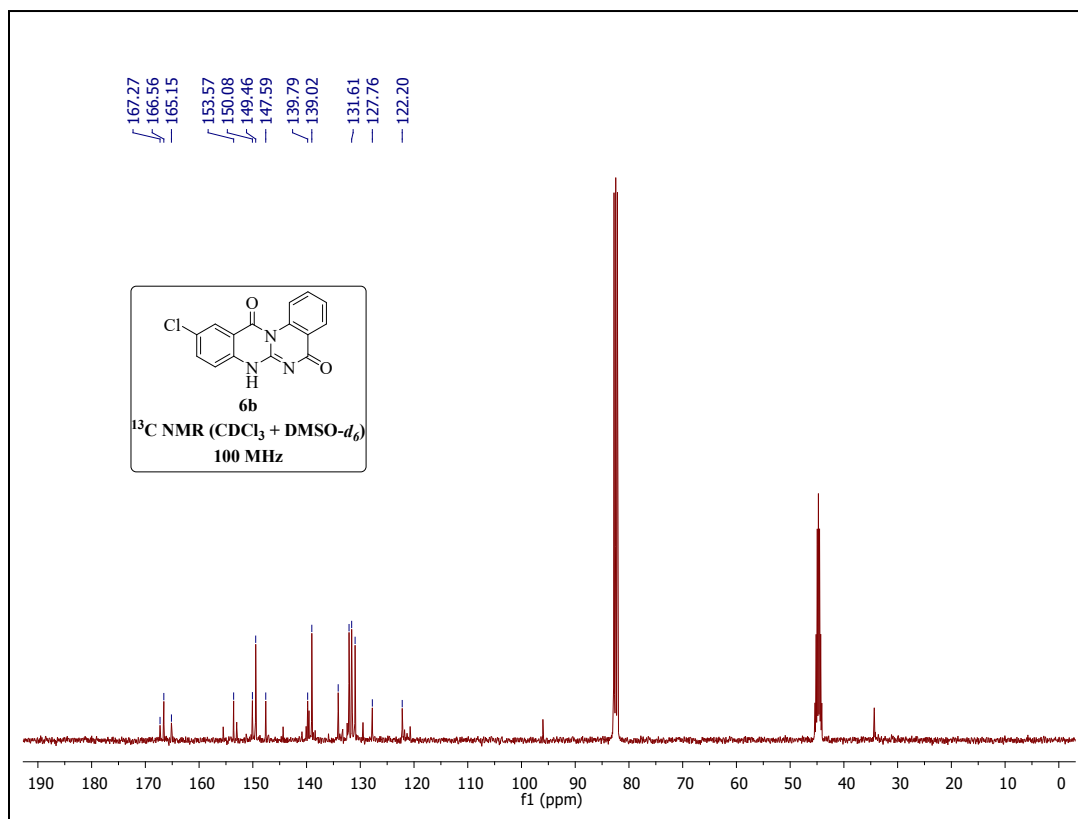



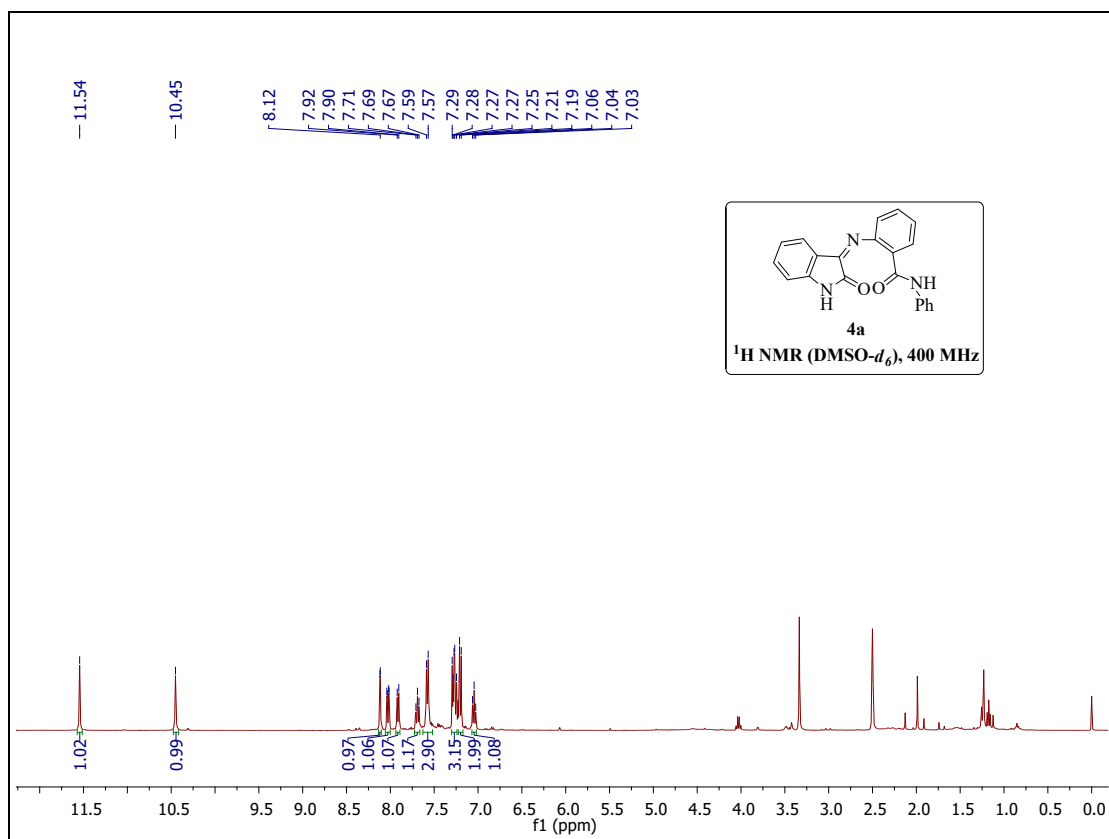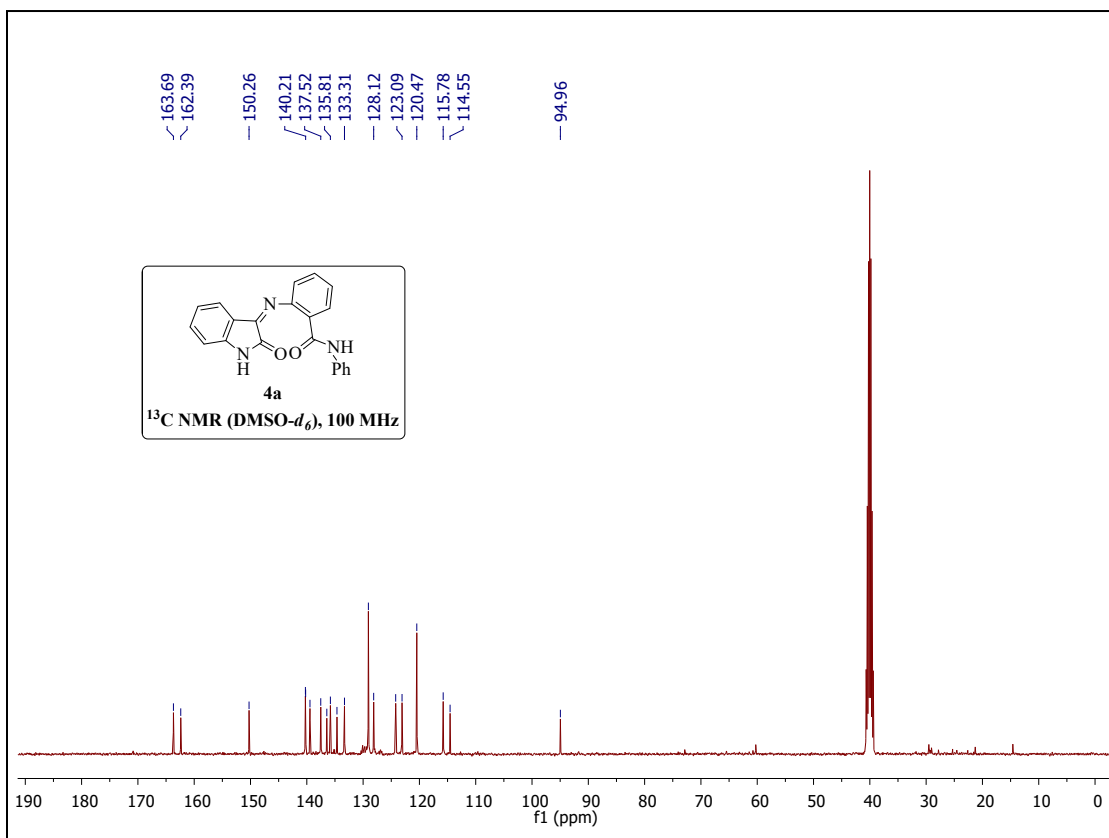

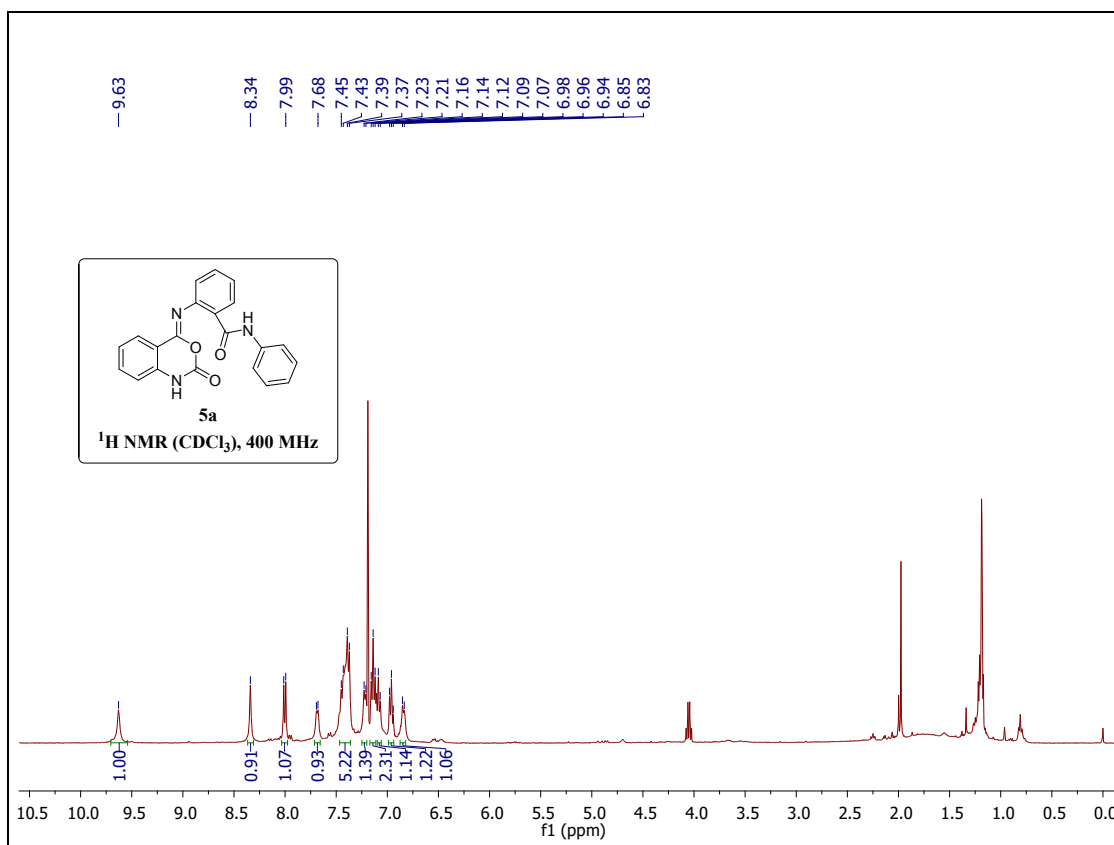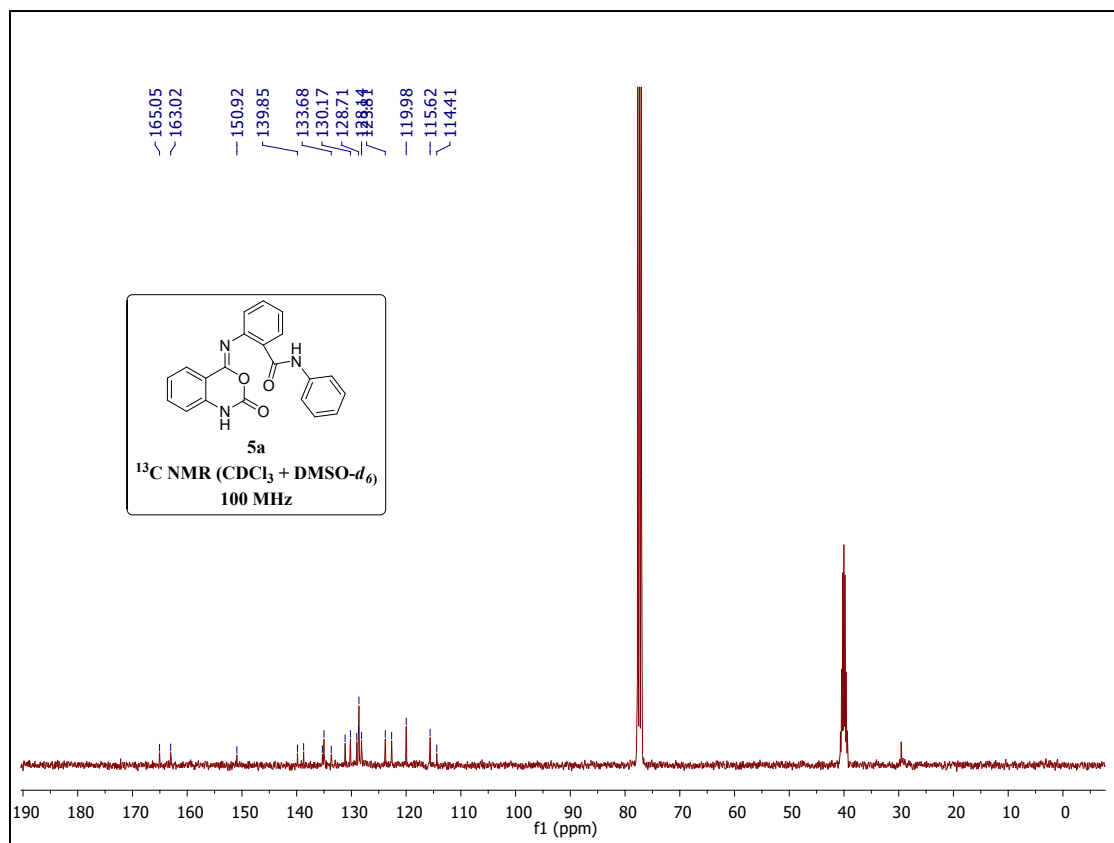

Supplement: RA-012-D2RA02216H-s001.pdf [file RA-012-D2RA02216H-s001.pdf]
